# Supplementary material for: Tryptophan Operon Diversity Reveals Evolutionary Trends among Geographically Disparate Chlamydia trachomatis Ocular and Urogenital Strains Affecting Tryptophan Repressor and Synthase Function
Source: PubMed Central journal article supplement (PMC8262981; doi:10.1128/mbio.00605-21), 2021-05-11
Supplement: mbio.00605-21-sd001.pdf [file mbio.00605-21-sd001.pdf]

**Supplementary Data 1.** List of *C. trachomatis* strains used in this study and associated metadata for the tryptophan operon nucleotide sequence.

| Name      | <i>omp A</i> |         |          | Year | Source    | operon     |      |           |           | Study    | Genome     |              |
|-----------|--------------|---------|----------|------|-----------|------------|------|-----------|-----------|----------|------------|--------------|
|           | Lineage      | Genotyp | Country  |      |           | Gender     | (bp) | ENA ERR   | ENA ERS   | NCBI     | accession  | Reference    |
| A_A8      | ocular       | A       | Sudan    | M    | 2016-2019 | ocular     | 2563 |           |           |          | PRJEB32246 | Alkidir 2019 |
| A_A15     | ocular       | A       | Sudan    | F    | 2016-2019 | ocular     | 2563 |           |           |          | PRJEB32246 | Alkidir 2019 |
| A_363     | ocular       | A       | Tanzania | F    | 2000      | ocular     | 2565 | ERR034213 | ERS017900 | -        |            | Harris 2012  |
| A_2497    | ocular       | A       | Tanzania | F    | 2000      | ocular     | 2565 | -         | -         | FM872306 |            | Harris 2012  |
| A_5291    | ocular       | A       | Tanzania | F    | 2000      | ocular     | 2565 | ERR034214 | ERS017901 | -        |            | Harris 2012  |
| A_7249    | ocular       | A       | Tanzania | M    | 2000      | ocular     | 2565 | ERR034215 | ERS017902 | -        |            | Harris 2012  |
| A_D213    | ocular       | A       | Gambia   | M    | 2001      | ocular     | 2562 | ERR175652 | ERS177838 | -        |            |              |
| A_D230    | ocular       | A       | Gambia   | F    | 2001      | ocular     | 2562 | ERR111554 | ERS075177 | -        |            |              |
| A_HAR13   | ocular       | A       | Egypt    | F    | 1958      | conjunctiv | 2356 | -         | -         | CP000051 |            | Carlson 2005 |
| A_MH858   | ocular       | A       | Tanzania | M    | 2000      | ocular     | 2565 | ERR175560 | ERS177716 | -        |            |              |
| A_MH1364  | ocular       | A       | Tanzania | F    | 2000      | ocular     | 2565 | ERR175575 | ERS177731 | -        |            |              |
| A_MH2145  | ocular       | A       | Tanzania | F    | 2000      | ocular     | 2565 | ERR175561 | ERS177717 | -        |            |              |
| A_MH2497  | ocular       | A       | Tanzania | F    | 2000      | ocular     | 2565 | ERR175562 | ERS177718 | -        |            |              |
| A_MH3234  | ocular       | A       | Tanzania | F    | 2000      | ocular     | 2565 | ERR175576 | ERS177732 | -        |            |              |
| A_MH4510  | ocular       | A       | Tanzania | F    | 2000      | ocular     | 2565 | ERR175577 | ERS177733 | -        |            |              |
| A_MH5368  | ocular       | A       | Tanzania | F    | 2000      | ocular     | 2565 | ERR175563 | ERS177719 | -        |            |              |
| A_MH5786  | ocular       | A       | Tanzania | M    | 2000      | ocular     | 2565 | ERR175564 | ERS177720 | -        |            |              |
| A_MH6446  | ocular       | A       | Tanzania | M    | 2000      | ocular     | 2565 | ERR175578 | ERS177734 | -        |            |              |
| A_MH7205  | ocular       | A       | Tanzania | M    | 2000      | ocular     | 2565 | ERR175579 | ERS177735 | -        |            |              |
| A_MH8910  | ocular       | A       | Tanzania | M    | 2000      | ocular     | 2565 | ERR175580 | ERS177736 | -        |            |              |
| A_MH9922  | ocular       | A       | Tanzania | F    | 2000      | ocular     | 2565 | ERR175581 | ERS177737 | -        |            |              |
| A_MH10549 | ocular       | A       | Tanzania | M    | 2000      | ocular     | 2565 | ERR175582 | ERS177738 | -        |            |              |
| A_MH10648 | ocular       | A       | Tanzania | F    | 2000      | ocular     | 2565 | ERR175583 | ERS177739 | -        |            |              |
| A_MH10901 | ocular       | A       | Tanzania | M    | 2000      | ocular     | 2565 | ERR175584 | ERS177740 | -        |            |              |
| A_MH11715 | ocular       | A       | Tanzania | M    | 2000      | ocular     | 2565 | ERR175585 | ERS177741 | -        |            |              |
| A_MH11979 | ocular       | A       | Tanzania | M    | 2000      | ocular     | 2565 | ERR175586 | ERS177742 | -        |            |              |
| A_MH12023 | ocular       | A       | Tanzania | F    | 2000      | ocular     | 2565 | ERR175565 | ERS177721 | -        |            |              |
| A_MH13849 | ocular       | A       | Tanzania | M    | 2000      | ocular     | 2565 | ERR175566 | ERS177722 | -        |            |              |
| A_MH14553 | ocular       | A       | Tanzania | F    | 2000      | ocular     | 2565 | ERR175567 | ERS177723 | -        |            |              |
| A_MH15048 | ocular       | A       | Tanzania | F    | 2000      | ocular     | 2565 | ERR175587 | ERS177743 | -        |            |              |
| A_MH15741 | ocular       | A       | Tanzania | F    | 2000      | ocular     | 2565 | ERR175588 | ERS177744 | -        |            |              |
| A_MH16005 | ocular       | A       | Tanzania | M    | 2000      | ocular     | 2565 | ERR175568 | ERS177724 | -        |            |              |
| A_MH16170 | ocular       | A       | Tanzania | M    | 2000      | ocular     | 2565 | ERR175589 | ERS177745 | -        |            |              |
| A_MH16665 | ocular       | A       | Tanzania | M    | 2000      | ocular     | 2565 | ERR175590 | ERS177746 | -        |            |              |
| A_MH17127 | ocular       | A       | Tanzania | M    | 2000      | ocular     | 2565 | ERR175591 | ERS177747 | -        |            |              |
| A_MH18843 | ocular       | A       | Tanzania | F    | 2000      | ocular     | 2565 | ERR175569 | ERS177725 | -        |            |              |
| A_MH18876 | ocular       | A       | Tanzania | F    | 2000      | ocular     | 2565 | ERR175592 | ERS177748 | -        |            |              |
| A_MH19657 | ocular       | A       | Tanzania | M    | 2000      | ocular     | 2565 | ERR175570 | ERS177726 | -        |            |              |

|            |         |      |                |   |           |            |      |           |           |   |            |                |
|------------|---------|------|----------------|---|-----------|------------|------|-----------|-----------|---|------------|----------------|
| A_MH19679  | ocular  | A    | Tanzania       | F | 2000      | ocular     | 2565 | ERR175593 | ERS177749 | - |            |                |
| A_MH20130  | ocular  | A    | Tanzania       | F | 2000      | ocular     | 2565 | ERR175594 | ERS177750 | - |            |                |
| A_MH20933  | ocular  | A    | Tanzania       | F | 2000      | ocular     | 2565 | ERR175595 | ERS177751 | - |            |                |
| A_MH21571  | ocular  | A    | Tanzania       | F | 2000      | ocular     | 2565 | ERR175596 | ERS177752 | - |            |                |
| A_MH23527  | ocular  | A    | Tanzania       | F | 2000      | ocular     | 2565 | ERR175571 | ERS177727 | - |            |                |
| A_MH24519  | ocular  | A    | Tanzania       | M | 2000      | ocular     | 2565 | ERR175597 | ERS177753 | - |            |                |
| A_MH24640  | ocular  | A    | Tanzania       | F | 2000      | ocular     | 2565 | ERR175598 | ERS177754 | - |            |                |
| A_MH24673  | ocular  | A    | Tanzania       | M | 2000      | ocular     | 2565 | ERR175572 | ERS177728 | - |            |                |
| A_MH25256  | ocular  | A    | Tanzania       | M | 2000      | ocular     | 2565 | ERR175573 | ERS177729 | - |            |                |
| A_MH25883  | ocular  | A    | Tanzania       | F | 2000      | ocular     | 2565 | ERR175599 | ERS177755 | - |            |                |
| A_MH26862  | ocular  | A    | Tanzania       | F | 2000      | ocular     | 2565 | ERR175600 | ERS177756 | - |            |                |
| A_MH27137  | ocular  | A    | Tanzania       | F | 2000      | ocular     | 2565 | ERR175601 | ERS177757 | - |            |                |
| A_MH35739  | ocular  | A    | Tanzania       | M | 2000      | ocular     | 2565 | ERR175603 | ERS177759 | - |            |                |
| A_MH47300  | ocular  | A    | Tanzania       | F | 2000      | ocular     | 2565 | ERR175574 | ERS177730 | - |            |                |
| A_MH53658  | ocular  | A    | Tanzania       | F | 2000      | ocular     | 2565 | ERR175604 | ERS177760 | - |            |                |
| A_SA1      | ocular  | A    | Saudi Arabia   | F | 1957      | ocular     | 2562 | ERR558498 | ERS177777 | - |            |                |
| A_SB002739 | ocular  | A    | Solomon Island |   | 2013      | ocular     | 2562 | -         | -         | - | CP016418   | Butcher 2016   |
| A_SB006930 | ocular  | A    | Solomon Island |   | 2013      | ocular     | 2562 | -         | -         | - | CP016420   | Butcher 2016   |
| A_SB008107 | ocular  | A    | Solomon Island |   | 2013      | ocular     | 2562 | -         | -         | - | CP016422   | Butcher 2016   |
| A_SB013112 | ocular  | A    | Solomon Island |   | 2013      | ocular     | 2562 | -         | -         | - | CP016424   | Butcher 2016   |
| A_SB013321 | ocular  | A    | Solomon Island |   | 2013      | ocular     | 2562 | -         | -         | - | CP016426   | Butcher 2016   |
| A_B1       | ocular  | A    | Sudan          | M | 2016-2019 | ocular     | 2562 | -         | -         | - | PRJEB32246 | Alkidir 2019   |
| A_B9       | ocular  | A    | Sudan          | F | 2016-2019 | ocular     | 2563 | -         | -         | - | PRJEB32246 | Alkidir 2019   |
| A_B13      | ocular  | A    | Sudan          | F | 2016-2019 | ocular     | 2563 | -         | -         | - | PRJEB32246 | Alkidir 2019   |
| A_S45      | ocular  | A    | Sudan          | M | 2016-2019 | ocular     | 2563 | -         | -         | - | PRJEB32246 | Alkidir 2019   |
| A_S59      | ocular  | A    | Sudan          | F | 2016-2019 | ocular     | 2562 | -         | -         | - | PRJEB32246 | Alkidir 2019   |
| A_T94      | ocular  | A    | Sudan          | F | 2016-2019 | ocular     | 2562 | -         | -         | - | PRJEB32246 | Alkidir 2019   |
| A_TF16     | ocular  | A    | Sudan          | F | 2016-2019 | ocular     | 2562 | -         | -         | - | PRJEB32246 | Alkidir 2019   |
| A_TF34     | ocular  | A    | Sudan          | F | 2016-2019 | ocular     | 2562 | -         | -         | - | PRJEB32246 | Alkidir 2019   |
| A_TF54     | ocular  | A    | Sudan          | M | 2016-2019 | ocular     | 2562 | -         | -         | - | PRJEB32246 | Alkidir 2019   |
| A_J52      | ocular  | A    | Sudan          | M | 2016-2019 | ocular     | 2562 | -         | -         | - | PRJEB32246 | Alkidir 2019   |
| Ba_Apache2 | ocular  | Ba   | USA            |   | 1960      | ocular     | 2563 | ERR140762 | ERS095032 | - |            |                |
| B_Aus2     | genital | B-Ba | Australia      |   |           | unknown    | 2566 | ERR189742 | ERS153019 | - |            | Andersson 2016 |
| B_Aus3     | genital | B-Ba | Australia      |   | 1986-1989 | unknown    | 2566 | ERR189743 | ERS153020 | - |            | Andersson 2016 |
| B_Aus4     | genital | B-Ba | Australia      |   | 1986-1989 | unknown    | 2566 | ERR189744 | ERS153021 | - |            | Andersson 2016 |
| B_Aus5     | genital | B-Ba | Australia      |   | 1986-1989 | unknown    | 2566 | ERR189745 | ERS153022 | - |            | Andersson 2016 |
| B_Aus6     | genital | B-Ba | Australia      |   | 1986-1989 | unknown    | 2566 | ERR189766 | ERS153043 | - |            | Andersson 2016 |
| Ba_Aus25   | genital | Ba   | Australia      |   | 1988      | ocular     | 2566 | ERR386232 | ERS351392 | - |            | Andersson 2016 |
| Ba_Aus28   | genital | Ba   | Australia      |   | 1988      | ocular     | 2566 | ERR386222 | ERS351377 | - |            | Andersson 2016 |
| B_Aus36    | genital | B-Ba | Australia      |   | 1989      | ocular     | 2566 | ERR386225 | ERS351385 | - |            | Andersson 2016 |
| B_Aus40    | genital | B-Ba | Australia      |   |           | endocervic | 2566 | ERR999730 | ERS747489 | - |            | Andersson 2016 |

|            |         |      |              |    |           |            |      |           |           |          |                 |
|------------|---------|------|--------------|----|-----------|------------|------|-----------|-----------|----------|-----------------|
| B_Aus41    | genital | B-Ba | Australia    |    |           | endocervix | 2566 | ERR999731 | ERS747490 | -        | Andersson 2016  |
| B_Aus42    | genital | B-Ba | Australia    |    |           | endocervix | 2566 | ERR999732 | ERS747491 | -        | Andersson 2016  |
| B_Aus43    | genital | B-Ba | Australia    |    |           | endocervix | 2566 | ERR999733 | ERS747492 | -        | Andersson 2016  |
| B_Aus44    | genital | B-Ba | Australia    |    |           | endocervix | 2566 | ERR999734 | ERS747493 | -        | Andersson 2016  |
| B_Aus45    | genital | B-Ba | Australia    |    |           | endocervix | 2566 | ERR999735 | ERS747494 | -        | Andersson 2016  |
| B_Fin101   | genital | B-Ba | Finland      | F  | 2009      | endocervix | 2566 | ERR278185 | ERS200114 | -        |                 |
| B_Fin203   | genital | B-Ba | Finland      | F  | 2011      | endocervix | 2566 | ERR278154 | ERS200083 | -        |                 |
| B_HAR36    | ocular  | B-Ba | Saudi Arabia |    | 1969      | ocular     | 2562 | ERR189736 | ERS153013 | -        |                 |
| B_Jali16   | ocular  | B-Ba | Gambia       |    | 1985      | ocular     | 2562 | ERR189738 | ERS153015 | -        |                 |
| B_Jali20   | ocular  | B-Ba | Gambia       |    | 1985      | ocular     | 2562 | -         | -         | FM872308 | Seth-Smith 2009 |
| B_M48      | ocular  | B-Ba | Gambia       | M  | 2007      | ocular     | 2564 | ERR175631 | ERS177817 | -        |                 |
| B_NL2      | genital | B-Ba | Netherlands  | F  | 2001      | endocervix | 2566 | ERR211016 | ERS161066 | -        |                 |
| B/QH111L   |         | B    | China        | M  | 2016      | ocular     | 2434 |           |           | CP018052 | Feng Le 2016    |
| B_Sou42    | genital | B-Ba | UK           |    | 1985      | Unknown    | 2566 | ERR210997 | ERS161047 | -        |                 |
| B_TZ1A828  | ocular  | B-Ba | Tanzania     | F  | 1998      | ocular     | 2541 | -         | -         | FM872307 | Seth-Smith 2009 |
| C_Aus8     | genital | C    | Australia    |    | 1986-1989 | unknown    | 2566 | ERR210992 | ERS161042 | -        | Andersson 2016  |
| C_Aus9     | genital | C    | Australia    |    | 1986-1989 | unknown    | 2566 | ERR189768 | ERS153045 | -        | Andersson 2016  |
| C_Aus10    | genital | C    | Australia    |    | 1986-1989 | unknown    | 2566 | ERR189746 | ERS153023 | -        | Andersson 2016  |
| C_Aus30    | genital | C    | Australia    | F  | 1988      | ocular     | 2566 | ERR386223 | ERS351383 | -        | Andersson 2016  |
| C_Aus33    | genital | C    | Australia    | M  | 1988      | ocular     | 2566 | ERR386224 | ERS351384 | -        | Andersson 2016  |
| C_TW3      | ocular  | C    | Taiwan       |    | 1959      | ocular     | 2562 | -         | -         | CP006945 |                 |
| C_UW10     | ocular  | C    | Canada       | M  | 1964      | ocular     | 2562 | ERR175630 | ERS177816 | -        | -               |
| Da_TW448   | ocular  | Da   | Taiwan       |    | 1985      | Conjunctiv | 2562 |           |           |          | This study      |
| D/13-96    |         | D    | USA, Seattle | NA | 1996      | endocervix |      | -         | -         | CP006676 | Putman 2013     |
| D/14-96    |         | D    | USA, Seattle | NA | 1996      | endocervix |      | -         | -         | CP006677 | Putman 2013     |
| D_Aus11    | genital | D    | Australia    |    | 1986-1989 | unknown    | 2566 | ERR189747 | ERS153024 | -        | Andersson 2016  |
| D_Aus12    | genital | D    | Australia    |    | 1986-1989 | unknown    | 2566 | ERR189767 | ERS153044 | -        | Andersson 2016  |
| D_C32      | genital | D    | UK           | F  | 2011      | Cx/Urethra | 2566 | ERR175621 | ERS177807 | -        | -               |
| D/CS637/11 |         | D    |              | F  |           | endocervix |      |           |           | CP007131 | Borges 2015     |
| D_Fin163   | genital | D    | Finland      | F  | 2010      | endocervix | 2566 | ERR278143 | ERS200072 | -        | -               |
| D_Fin178   | genital | D    | Finland      | F  | 2010      | endocervix | 2566 | ERR278147 | ERS200076 | -        | -               |
| D_Fin187   | genital | D    | Finland      | F  | 2010      | endocervix | 2566 | ERR278150 | ERS200079 | -        | -               |
| D_HonLC4   | genital | D    | Honduras     |    |           | unknown    | 2566 | ERR658366 | ERS151260 | -        | -               |
| D_HPA314   | genital | D    | UK           | F  |           | endocervix | 2566 | ERR108297 | ERS082979 | -        | -               |
| D_NL4      | genital | D    | Netherlands  | F  | 2001      | endocervix | 2566 | ERR211017 | ERS161067 | -        | -               |
| D_NL5      | genital | D    | Netherlands  | F  | 2001      | endocervix | 2566 | ERR211018 | ERS161068 | -        | -               |
| D_NL6      | genital | D    | Netherlands  | F  | 2001      | endocervix | 2566 | ERR164672 | ERS133259 | -        | -               |
| D_NL8      | genital | D    | Netherlands  | F  | 2001      | endocervix | 2566 | ERR164674 | ERS133261 | -        | -               |
| D_NL10     | genital | D    | Netherlands  | F  | 2001      | endocervix | 2566 | ERR164676 | ERS133263 | -        | -               |
| D_NL11     | genital | D    | Netherlands  | F  | 2001      | endocervix | 2566 | ERR164677 | ERS133264 | -        | -               |
| D_NL12     | genital | D    | Netherlands  | F  | 2001      | endocervix | 2566 | ERR164678 | ERS133265 | -        | -               |

|            |         |   |             |   |      |                 |           |           |          |             |
|------------|---------|---|-------------|---|------|-----------------|-----------|-----------|----------|-------------|
| D_NL13     | genital | D | Netherlands | F | 2001 | endocervix 2566 | ERR164679 | ERS133266 | -        | -           |
| D_NL14     | genital | D | Netherlands | F | 2001 | endocervix 2566 | ERR164680 | ERS133267 | -        | -           |
| D_NL15     | genital | D | Netherlands | F | 2001 | endocervix 2566 | ERR164681 | ERS133268 | -        | -           |
| D_NL16     | genital | D | Netherlands | F | 2001 | endocervix 2566 | ERR210970 | ERS161020 | -        | -           |
| D_NL17     | genital | D | Netherlands | F | 2001 | endocervix 2566 | ERR164682 | ERS133269 | -        | -           |
| D_NL19     | genital | D | Netherlands | F | 2001 | endocervix 2566 | ERR164684 | ERS133271 | -        | -           |
| D_NL32     | genital | D | Netherlands | F | 2001 | endocervix 2566 | ERR189763 | ERS153040 | -        | -           |
| D_NL59     | genital | D | Netherlands | F | 2001 | endocervix 2566 | ERR189765 | ERS153042 | -        | -           |
| D_NL71     | genital | D | Netherlands | F | 2001 | endocervix 2566 | ERR210988 | ERS161038 | -        | -           |
| D_S276I    | genital | D | Sweden      | F | 2011 | endocervix 2566 | ERR140754 | ERS095024 | -        | -           |
| D_S1736    | genital | D | Sweden      | F | 2010 | endocervix 2566 | ERR108286 | ERS082968 | -        | -           |
| D_S1879    | genital | D | Sweden      | M | 2010 | urethra 2566    | ERR108287 | ERS082969 | -        | -           |
| D_S2130    | genital | D | Sweden      | F | 2010 | endocervix 2566 | ERR111586 | ERS075209 | -        | -           |
| D_S3257    | genital | D | Sweden      | F | 2010 | endocervix 2566 | ERR111590 | ERS075213 | -        | -           |
| D_S3489    | genital | D | Sweden      | F | 2010 | endocervix 2566 | ERR111589 | ERS075212 | -        | -           |
| D_S3929    | genital | D | Sweden      | F | 2010 | endocervix 2566 | ERR111578 | ERS075201 | -        | -           |
| D_S4093    | genital | D | Sweden      | F | 2010 | endocervix 2566 | ERR140804 | ERS095074 | -        | -           |
| D_S4828    | genital | D | Sweden      | F | 2010 | endocervix 2566 | ERR108294 | ERS082976 | -        | -           |
| D_SF2      | genital | D | USA         | F | 2003 | endocervix 2566 |           |           |          | This study  |
| D_SF12     | genital | D | USA         | F | 2003 | endocervix 2566 |           |           |          | This study  |
| D_Soton15  | genital | D | UK          | F | 2009 | endocervix 2566 | ERR026568 | ERS013807 | -        | -           |
| D_Soton42  | genital | D | UK          | F | 2009 | endocervix 2566 | ERR140819 | ERS095089 | -        | -           |
| D_Soton47  | genital | D | UK          | F | 2009 | endocervix 2566 | ERR026573 | ERS013812 | -        | -           |
| D_Soton49  | genital | D | UK          | F | 2009 | endocervix 2566 | ERR140821 | ERS095091 | -        | -           |
| D_Soton54  | genital | D | UK          | F | 2009 | endocervix 2566 | ERR140822 | ERS095092 | -        | -           |
| D_Soton128 | genital | D | UK          | F | 2009 | endocervix 2566 | ERR140826 | ERS095096 | -        | -           |
| D_Soton150 | genital | D | UK          | F | 2009 | endocervix 2566 | ERR026586 | ERS013823 | -        | -           |
| D_SotonD1  | genital | D | UK          | F | 2009 | endocervix 2566 | ERR027327 | ERS008761 | -        | Harris 2012 |
| D_SotonD2  | genital | D | UK          | F | 2009 | endocervix 2566 | ERR026542 | ERS013784 | -        |             |
| D_SotonD3  | genital | D | UK          | F | 2009 | endocervix 2566 | ERR026545 | ERS013785 | -        |             |
| D_SotonD4  | genital | D | UK          | F | 2009 | endocervix 2566 | ERR026546 | ERS013786 | -        |             |
| D_SotonD5  | genital | D | UK          | F | 2009 | endocervix 2566 | ERR026547 | ERS013787 | -        | Harris 2012 |
| D_SotonD6  | genital | D | UK          | F | 2009 | endocervix 2566 | ERR027328 | ERS008762 | -        | Harris 2012 |
| D_SQ29     | genital |   | USA         |   | 1991 | unknown 2566    |           |           | CP017731 |             |
| D_SQ32     | genital |   | USA         |   | 1995 | unknown 2566    |           |           | CP017730 |             |
| D_STN101   | genital | D | UK          |   | 1985 | unknown 2566    | ERR658584 | ERS208565 | -        | -           |
| D_STN113   | genital | D | UK          |   | 1985 | unknown 2566    | ERR658586 | ERS208567 |          |             |
| D_T9p      | genital | D | UK          |   | 2012 | unknown 2566    | ERR140781 | ERS095051 | -        | -           |
| D_UK466322 | genital | D | UK          | F | 2012 | Cx/Urethra 2566 | ERR658635 | ERS208362 | -        | -           |
| D_UK66361C | genital | D | UK          | F | 2012 | Cx/Urethra 2566 | ERR658666 | ERS208393 | -        | -           |
| D_UK750376 | genital | D | UK          | M | 2012 | urethra 2566    | ERR658498 | ERS160257 | -        | -           |

|            |         |   |           |   |           |            |      |           |           |          |                |
|------------|---------|---|-----------|---|-----------|------------|------|-----------|-----------|----------|----------------|
| D_UK750525 | genital | D | UK        | F | 2012      | endocervix | 2566 | ERR658501 | ERS160260 | -        | -              |
| D_UK912432 | genital | D | UK        | F | 2012      | Cx/Urethra | 2566 | ERR658673 | ERS208400 | -        | -              |
| D_UW3CX    | genital | D | USA       | F | 1965      | endocervix | 2566 | -         | -         | AE001273 | Stephens 1998  |
| E-103      | genital | E | Germany   | F | 1992      | unknown    | 2566 | -         | -         | CP015294 | Eder 2017      |
| E_150      | genital | E | 0         | M |           | rectum     | 2566 | -         | -         | CP001886 | Jeffrey 2010   |
| E_160      | genital | E | Germany   | F | 1995      | unknown    | 2566 | -         | -         | CP001886 | Eder 2017      |
| E_547      | genital | E | Germany   | F | 1991      | unknown    | 2566 | -         | -         | CP015298 | Eder 2017      |
| E_940U470  | genital | E | USA       | M |           | urethra    | 2566 | ERR348845 | ERS248053 | -        | -              |
| E_12-94    | genital | E | USA       |   |           | unknown    | 2566 | -         | -         | CP006675 | Putman 2013    |
| E_8873     | genital | E | Germany   | F | 1998      | unknown    | 2566 | -         | -         | CP015300 | Eder 2017      |
| E_11023    | genital | E |           | F |           | endocervix | 2566 | -         | -         | CP001890 | Jeffrey 2010   |
| E_32931    | genital | E | Germany   | F |           | vagina     | 2566 | -         | -         | CP015302 | Eder 2017      |
| E_Ar5      | genital | E | Argentina | F | 2006      | endocervix | 2566 | ERR111634 | ERS082951 | -        | -              |
| E_Ar152    | genital | E | Argentina | F | 2005      | ocular     | 2566 | ERR111636 | ERS082953 | -        | -              |
| E_Ar182    | genital | E | Argentina | M | 2008      | urethra    | 2566 | ERR108273 | ERS082955 | -        | -              |
| E_Ar250    | genital | E | Argentina | M | 2006      | ocular     | 2566 | ERR658410 | ERS160297 | -        | -              |
| E_Ar427    | genital | E | Argentina | F | 2011      | endocervix | 2566 | ERR108279 | ERS082961 | -        | -              |
| E_Ar7218   | genital | E | Argentina | M | 2004      | ocular     | 2566 | ERR108280 | ERS082962 | -        | -              |
| E_Aus13    | genital | E | Australia |   | 1986-1989 | unknown    | 2566 | ERR189761 | ERS153038 | -        | Andersson 2016 |
| E_Bour     | genital | E | USA       | M | 1959      | ocular     | 2566 | ERR008578 | ERS001401 | HE603212 | Harris 2012    |
| E_C5       | genital | E | UK        | F | 2011      | vagina     | 2566 | ERR175618 | ERS177804 | -        | -              |
| E_C37      | genital | E | UK        | F | 2011      | vagina     | 2566 | ERR175623 | ERS177809 | -        | -              |
| E_C58      | genital | E | UK        | F | 2011      | vagina     | 2566 | ERR175626 | ERS177812 | -        | -              |
| E_C194     | genital | E | UK        | F | 2011      | vagina     | 2566 | ERR175638 | ERS177824 | -        | -              |
| E_C208     | genital | E | UK        | M | 2011      | Urine      | 2566 | ERR175640 | ERS177826 | -        | -              |
| E_C236     | genital | E | UK        | F | 2011      | Ur/Cx      | 2566 | ERR175643 | ERS177829 | -        | -              |
| E_C258     | genital | E | UK        |   | 2011      | unknown    | 2566 | ERR175646 | ERS177832 | -        | -              |
| E_C599     | genital | E | USA       | M | 1996      | urethra    | 2566 | ERR027326 | ERS008760 | -        | -              |
| E_CC15     | genital | E | UK        | F | 2009      | endocervix | 2566 | ERR140842 | ERS095112 | -        | -              |
| E_CC35     | genital | E | UK        | M | 2010      | urethra    | 2566 | ERR140843 | ERS095113 | -        | -              |
| E_CLIN1    | genital | E | USA       |   |           | endocervix | 2566 | -         | -         | -        | This study     |
| E_CLIN3    | genital | E | USA       |   |           | endocervix | 2566 | -         | -         | -        | This study     |
| E_CS102511 | genital | E | NA        | F | 2015      | endocervix |      | -         | -         | CP010567 | Borges 2015    |
| E_DK20     | genital | E | Denmark   |   | 1967      | conjunctiv | 2566 | ERR558495 | ERS177774 | -        | -              |
| E_Fin127   | genital | E | Finland   | F | 2010      | endocervix | 2566 | ERR278134 | ERS200063 | -        | -              |
| E_Fin129   | genital | E | Finland   | F | 2010      | endocervix | 2566 | ERR278135 | ERS200064 | -        | -              |
| E_Fin142   | genital | E | Finland   | F | 2010      | endocervix | 2566 | ERR278136 | ERS200065 | -        | -              |
| E_Fin155   | genital | E | Finland   | F | 2010      | endocervix | 2566 | ERR278141 | ERS200070 | -        | -              |
| E_Fin159   | genital | E | Finland   | F | 2010      | endocervix | 2566 | ERR278187 | ERS200116 | -        | -              |
| E_Fin172   | genital | E | Finland   | F | 2010      | endocervix | 2566 | ERR278145 | ERS200074 | -        | -              |
| E_Fin184   | genital | E | Finland   | F | 2010      | endocervix | 2566 | ERR278148 | ERS200077 | -        | -              |

|           |         |   |             |   |      |                 |           |           |          |                 |
|-----------|---------|---|-------------|---|------|-----------------|-----------|-----------|----------|-----------------|
| E_Fin185  | genital | E | Finland     | F | 2010 | endocervix 2566 | ERR278149 | ERS200078 | -        | -               |
| E_Fin194  | genital | E | Finland     | F | 2010 | endocervix 2566 | ERR278152 | ERS200081 | -        | -               |
| E_Fin198  | genital | E | Finland     | F | 2010 | endocervix 2566 | ERR278153 | ERS200082 | -        | -               |
| E_Fin214  | genital | E | Finland     | F | 2011 | endocervix 2566 | ERR278158 | ERS200087 | -        | -               |
| E_Fin220  | genital | E | Finland     | F | 2011 | endocervix 2566 | ERR278161 | ERS200090 | -        | -               |
| E_It246   | genital | E | Italy       | F | 2010 | endocervix 2566 | ERR658535 | ERS208511 | -        | -               |
| E_It363   | genital | E | Italy       | F | 2010 | endocervix 2566 | ERR658534 | ERS208510 | -        | -               |
| E_It769   | genital | E | Italy       | F | 2011 | endocervix 2566 | ERR658536 | ERS208512 | -        | -               |
| E_It807   | genital | E | Italy       |   |      | unknown 2566    | ERR658407 | ERS160294 | -        | -               |
| E_IU824   | genital | E | USA         | F |      | endometriæ 2566 | ERR558500 | ERS177779 | HF562298 | O'Neill 2013    |
| E_IU888   | genital | E | USA         | F |      | endometriæ 2566 | ERR558501 | ERS177780 | HF562300 | O'Neill 2013    |
| E_NL21    | genital | E | Netherlands | F | 2001 | endocervix 2566 | ERR211019 | ERS161069 | -        | -               |
| E_NL23    | genital | E | Netherlands | F | 2001 | endocervix 2566 | ERR189756 | ERS153033 | -        | -               |
| E_NL24    | genital | E | Netherlands | F | 2001 | endocervix 2566 | ERR189757 | ERS153034 | -        | -               |
| E_NL26    | genital | E | Netherlands | F | 2001 | endocervix 2566 | ERR164687 | ERS133274 | -        | -               |
| E_NL28    | genital | E | Netherlands | F | 2001 | endocervix 2566 | ERR164689 | ERS133276 | -        | -               |
| E_NL29    | genital | E | Netherlands | F | 2001 | endocervix 2566 | ERR189758 | ERS153035 | -        | -               |
| E_R526    | genital | E | Russia      | F | 2011 | endocervix 2566 | ERR111568 | ERS075191 | -        | -               |
| E_R1430   | genital | E | Russia      | M | 2011 | urethra 2566    | ERR111621 | ERS082938 | -        | -               |
| E_R4159   | genital | E | Russia      | M | 2011 | urethra 2566    | ERR111615 | ERS082932 | -        | -               |
| E_R4195   | genital | E | Russia      | F | 2011 | endocervix 2566 | ERR140796 | ERS095066 | -        | -               |
| E_R4528   | genital | E | Russia      | F | 2011 | endocervix 2566 | ERR140835 | ERS095105 | -        | -               |
| E_R16965  | genital | E | Russia      | F | 2011 | endocervix 2566 | ERR140837 | ERS095107 | -        | -               |
| E_R25114  | genital | E | Russia      | F | 2010 | endocervix 2566 | ERR111596 | ERS075219 | -        | -               |
| E_R26833  | genital | E | Russia      | F | 2010 | endocervix 2566 | ERR111601 | ERS082918 | -        | Seth-Smith 2013 |
| E_R27091  | genital | E | Russia      | F | 2010 | endocervix 2566 | ERR111566 | ERS075189 | -        | Seth-Smith 2013 |
| E_R28017  | genital | E | Russia      | F | 2010 | endocervix 2566 | ERR111565 | ERS075188 | -        | Seth-Smith 2013 |
| E_R28044  | genital | E | Russia      | F | 2010 | endocervix 2566 | ERR111594 | ERS075217 | -        | -               |
| E_R29005  | genital | E | Russia      | F | 2010 | endocervix 2566 | ERR111630 | ERS082947 | -        | -               |
| E_R30444  | genital | E | Russia      | F | 2010 | endocervix 2566 | ERR111600 | ERS075223 | -        | -               |
| E_R32100  | genital | E | Russia      | F | 2010 | endocervix 2566 | ERR111563 | ERS075186 | -        | Seth-Smith 2013 |
| E_R33420  | genital | E | Russia      | F | 2010 | endocervix 2566 | ERR164655 | ERS133242 | -        | -               |
| E_R35067  | genital | E | Russia      | M | 2010 | urethra 2566    | ERR111567 | ERS075190 | -        | -               |
| E_Rb1392  | genital | E | UK          | F | 2010 | endocervix 2566 | ERR071994 | ERS066957 | -        | -               |
| E_Rb10387 | genital | E | UK          | M | 2010 | Unknown 2566    | ERR034219 | ERS017906 | -        | -               |
| E_Rb10392 | genital | E | UK          | F | 2010 | endocervix 2566 | ERR175633 | ERS177819 | -        | -               |
| E_S581    | genital | E | Sweden      | F | 2011 | endocervix 2566 | ERR189737 | ERS153014 | -        | -               |
| E_S1019   | genital | E | Sweden      | F | 2010 | endocervix 2566 | ERR140808 | ERS095078 | -        | -               |
| E_S1148   | genital | E | Sweden      | F | 2010 | endocervix 2566 | ERR140810 | ERS095080 | -        | -               |
| E_S1227   | genital | E | Sweden      | F | 2010 | endocervix 2566 | ERR140805 | ERS095075 | -        | -               |
| E_S1528   | genital | E | Sweden      | F | 2010 | endocervix 2566 | ERR140809 | ERS095079 | -        | -               |

|            |         |   |        |   |      |                  |           |           |   |            |
|------------|---------|---|--------|---|------|------------------|-----------|-----------|---|------------|
| E_S1613    | genital | E | Sweden | F | 2010 | endocervix 2566  | ERR140812 | ERS095082 | - | -          |
| E_S1618    | genital | E | Sweden | F | 2010 | endocervix 2566  | ERR108290 | ERS082972 | - | -          |
| E_S1886    | genital | E | Sweden | F | 2010 | endocervix 2566  | ERR108289 | ERS082971 | - | -          |
| E_S2384    | genital | E | Sweden | F | 2010 | endocervix 2566  | ERR140760 | ERS095030 | - | -          |
| E_S2491    | genital | E | Sweden | F | 2010 | endocervix 2566  | ERR108284 | ERS082966 | - | -          |
| E_S2699    | genital | E | Sweden | F | 2011 | endocervix 2566  | ERR140831 | ERS095101 | - | -          |
| E_S2713    | genital | E | Sweden | F | 2011 | endocervix 2566  | ERR140832 | ERS095102 | - | -          |
| E_S3024    | genital | E | Sweden | M | 2010 | conjunctiv: 2566 | ERR111579 | ERS075202 | - | -          |
| E_S3066    | genital | E | Sweden | F | 2011 | endocervix 2566  | ERR140841 | ERS095111 | - | -          |
| E_S3073    | genital | E | Sweden | F | 2010 | endocervix 2566  | ERR140801 | ERS095071 | - | -          |
| E_S3085    | genital | E | Sweden | F | 2011 | endocervix 2566  | ERR140833 | ERS095103 | - | -          |
| E_S3122    | genital | E | Sweden | F | 2010 | endocervix 2566  | ERR111582 | ERS075205 | - | -          |
| E_S3695    | genital | E | Sweden | F | 2006 | endocervix 2566  | ERR140815 | ERS095085 | - | -          |
| E_S3711    | genital | E | Sweden | F | 2011 | endocervix 2566  | ERR140834 | ERS095104 | - | -          |
| E_S3724    | genital | E | Sweden | F | 2006 | endocervix 2566  | ERR140816 | ERS095086 | - | -          |
| E_S3732    | genital | E | Sweden | F | 2010 | Unknown 2566     | ERR108282 | ERS082964 | - | -          |
| E_S4007    | genital | E | Sweden | F | 2006 | endocervix 2566  | ERR140817 | ERS095087 | - | -          |
| E_S4106    | genital | E | Sweden | F | 2010 | endocervix 2566  | ERR140803 | ERS095073 | - | -          |
| E_S4247    | genital | E | Sweden | M | 2010 | urethra 2566     | ERR108293 | ERS082975 | - | -          |
| E_S4324    | genital | E | Sweden | M | 2010 | urethra 2566     | ERR108288 | ERS082970 | - | -          |
| E_S4471    | genital | E | Sweden | F | 2010 | endocervix 2566  | ERR108285 | ERS082967 | - | -          |
| E_SF4      | genital | E | USA    | F | 2003 | endocervix 2566  | -         | -         | - | This study |
| E_SF9      | genital | E | USA    | F | 2003 | endocervix 2566  | -         | -         | - | This study |
| E_SF13     | genital | E | USA    | F | 2003 | endocervix 2566  | -         | -         | - | This study |
| E_SF14     | genital | E | USA    | F | 2003 | endocervix 2566  | -         | -         | - | This study |
| E_SF15     | genital | E | USA    | F | 2003 | endocervix 2566  | -         | -         | - | This study |
| E_SF17     | genital | E | USA    | F | 2003 | endocervix 2566  | -         | -         | - | This study |
| E_SF18     | genital | E | USA    | F | 2003 | endocervix 2566  | -         | -         | - | This study |
| E_SF23     | genital | E | USA    | F | 2003 | endocervix 2566  | -         | -         | - | This study |
| E_SF24     | genital | E | USA    | F | 2003 | endocervix 2566  | -         | -         | - | This study |
| E_SF26     | genital | E | USA    | F | 2003 | endocervix 2566  | -         | -         | - | This study |
| E_SF28     | genital | E | USA    | F | 2003 | endocervix 2566  | -         | -         | - | v          |
| E_Soton17  | genital | E | UK     | F | 2009 | endocervix 2566  | ERR111555 | ERS075178 | - | -          |
| E_Soton53  | genital | E | UK     | F | 2009 | endocervix 2566  | ERR111556 | ERS075179 | - | -          |
| E_Soton83  | genital | E | UK     | F | 2009 | endocervix 2566  | ERR140823 | ERS095093 | - | -          |
| E_Soton107 | genital | E | UK     | F | 2009 | endocervix 2566  | ERR111557 | ERS075180 | - | -          |
| E_Soton116 | genital | E | UK     | F | 2009 | endocervix 2566  | ERR111558 | ERS075181 | - | -          |
| E_Soton120 | genital | E | UK     | F | 2009 | endocervix 2566  | ERR111559 | ERS075182 | - | -          |
| E_Soton145 | genital | E | UK     | F | 2009 | endocervix 2566  | ERR111560 | ERS075183 | - | -          |
| E_Soton159 | genital | E | UK     | F | 2009 | endocervix 2566  | ERR111561 | ERS075184 | - | -          |
| E_SotonE2  | genital | E | UK     | F | 2009 | endocervix 2566  | ERR175612 | ERS013789 | - | -          |

|            |         |   |           |   |           |            |      |           |           |              |                 |
|------------|---------|---|-----------|---|-----------|------------|------|-----------|-----------|--------------|-----------------|
| E_SotonE4  | genital | E | UK        | F | 2009      | endocervix | 2566 | ERR026551 | ERS013791 | HE603232     | Harris 2012     |
| E_SotonE6  | genital | E | UK        | F | 2009      | endocervix | 2566 | ERR026543 | ERS013793 | -            | -               |
| E_SotonE8  | genital | E | UK        | F | 2009      | endocervix | 2566 | ERR027329 | ERS008763 | HE603233     | Harris 2012     |
| E_Sou60    | genital | E | UK        |   | 1985      | unknown    | 2566 | ERR210999 | ERS161049 | -            | -               |
| E_Sou75    | genital | E | UK        |   | 1985      | unknown    | 2566 | ERR211004 | ERS161054 | -            | -               |
| E_Sou102   | genital | E | UK        | F | 1985      | unknown    | 2566 | ERR211010 | ERS161060 | -            | -               |
| E_STN2     | genital | E | UK        |   | 1985      | unknown    | 2566 | ERR658574 | ERS208554 | -            | -               |
| E_STN10    | genital | E | UK        |   | 1985      | unknown    | 2566 | ERR658575 | ERS208555 | -            | -               |
| E_STN11    | genital | E | UK        |   | 1985      | unknown    | 2566 | ERR658576 | ERS208556 | -            | -               |
| E_STN12    | genital | E | UK        |   | 1985      | unknown    | 2566 | ERR658577 | ERS208557 | -            | -               |
| E_STN47    | genital | E | UK        |   | 1985      | unknown    | 2566 | ERR658581 | ERS208562 | -            | -               |
| E_STN68    | genital | E | UK        |   | 1985      | unknown    | 2566 | ERR658582 | ERS208563 | -            | -               |
| E_STN92    | genital | E | UK        |   | 1985      | unknown    | 2566 | ERR658583 | ERS208564 | -            | -               |
| E_STN115   | genital | E | UK        |   | 1985      | unknown    | 2566 | ERR658587 | ERS208568 | -            | -               |
| E_STN119   | genital | E | UK        |   | 1985      | unknown    | 2566 | ERR658588 | ERS208569 | -            | -               |
| E_SW2      | genital | E | Sweden    | M | 2006      | urethra    | 2566 | ERR008596 | ERS001397 | FM865439     | Unemo 2010      |
| E_SW3      | genital | E | Sweden    | F | 2001      | endocervix | 2566 | ERR008589 | ERS001406 | FM865440     | Harris 2012     |
| E_Swab6    | genital | E | UK        | F | 2010      | vagina     | 2566 | ERR175608 | ERS177764 | -            | Seth-Smith 2013 |
| E_SwabB4   | genital | E | UK        | F | 2010      | unknown    | 2566 | ERR034345 | ERS015770 | -            | Seth-Smith 2013 |
| E_UK34334  | genital | E | UK        | M | 2012      | urethra    | 2566 | ERR658682 | ERS208409 | -            | -               |
| E_UK466129 | genital | E | UK        | F | 2012      | Cx/Urethra | 2566 | ERR658591 | ERS208318 | -            | -               |
| E_UK466546 | genital | E | UK        | F | 2012      | Cx/Urethra | 2566 | ERR658639 | ERS208366 | -            | -               |
| E_UK582206 | genital | E | UK        | F | 2012      | Cx/Urethra | 2566 | ERR658642 | ERS208369 | -            | -               |
| E_UK582263 | genital | E | UK        | F | 2012      | Cx/Urethra | 2566 | ERR658595 | ERS208322 | -            | -               |
| E_UK584031 | genital | E | UK        | F | 2012      | Cx/Urethra | 2566 | ERR658602 | ERS208329 | -            | -               |
| E_UK663813 | genital | E | UK        | F | 2012      | Cx/Urethra | 2566 | ERR658606 | ERS208333 | -            | -               |
| E_UK663968 | genital | E | UK        | M | 2012      | urethra    | 2566 | ERR658668 | ERS208395 | -            | -               |
| E_UK664394 | genital | E | UK        | M | 2012      | urethra    | 2566 | ERR658669 | ERS208396 | -            | -               |
| E_UK769748 | genital | E | UK        | F | 2012      | Cx/Urethra | 2566 | ERR658670 | ERS208397 | -            | -               |
| E_UK769852 | genital | E | UK        | M | 2012      | urethra    | 2566 | ERR658671 | ERS208398 | -            | -               |
| E_UK913723 | genital | E | UK        | F | 2012      | Cx/Urethra | 2566 | ERR658617 | ERS208344 | -            | -               |
| E_UK913953 | genital | E | UK        | F | 2012      | vagina     | 2566 | ERR658619 | ERS208346 | -            | -               |
| F_70       | genital | F |           |   |           | unknown    | 2566 | -         | -         | ABYF01000001 | Jeffrey 2010    |
| F_1-93     | genital | F | USA       | F | 1993      | endocervix | 2566 | -         | -         | CP006671     | Putman 2013     |
| F_2-93     | genital | F | USA       | F | 1993      | endocervix | 2566 | -         | -         | CP006672     | Putman 2013     |
| F_6-94     | genital | F | USA       | F | 1994      | endocervix | 2566 | -         | -         | CP006673     | Putman 2013     |
| F_11-96    | genital | F | USA       | F | 1996      | endocervix | 2566 | -         | -         | CP006674     | Putman 2013     |
| F_6068     | genital | F | Germany   | F |           | urethra    |      |           |           | CP015306     | Eder 2017       |
| F_AddT9    | genital | F | UK        |   |           | unknown    | 2566 | ERR658365 | ERS151259 | -            | -               |
| F_Aus20    | genital | F | Australia |   | 1986-1989 | unknown    | 2566 | ERR189754 | ERS153031 | -            | Andersson 2016  |
| F_C55      | genital | F | UK        | F | 2011      | vagina     | 2566 | ERR175625 | ERS177811 | -            | -               |



|            |         |   |             |   |      |                  |           |             |                |
|------------|---------|---|-------------|---|------|------------------|-----------|-------------|----------------|
| F_CS84708  | genital | F |             | F | 2015 | endocervix       |           | CP010569    | Borges 2015    |
| F_Fin106   | genital | F | Finland     | F | 2010 | endocervix 2566  | ERR278132 | ERS200061 - | -              |
| F_Fin152   | genital | F | Finland     | F | 2010 | endocervix 2566  | ERR278139 | ERS200068 - | -              |
| F_Fin175   | genital | F | Finland     | F | 2010 | endocervix 2566  | ERR278146 | ERS200075 - | -              |
| F_Fin181   | genital | F | Finland     | F | 2010 | endocervix 2566  | ERR278162 | ERS200091 - | -              |
| F_Fin213   | genital | F | Finland     | F | 2011 | endocervix 2566  | ERR278190 | ERS200119 - | -              |
| F_Fin219   | genital | F | Finland     | F | 2011 | endocervix 2566  | ERR278160 | ERS200089 - | -              |
| F_IC-Cal-3 | genital | F | USA         |   | 1960 | ocular (nec 2566 | ERR278181 | ERS200110 - | Joseph 2012    |
| F_It686    | genital | F | Italy       | F | 2011 | endocervix 2566  | ERR658532 | ERS208508 - | -              |
| F_It688    | genital | F | Italy       | M | 2011 | urethra 2566     | ERR140764 | ERS095034 - | -              |
| F_NI1      | genital | F | Unknown     |   |      | unknown 2566     | ERR175650 | ERS177836 - | -              |
| F_NL30     | genital | F | Netherlands | F | 2001 | endocervix 2566  | ERR164690 | ERS133277 - | -              |
| F_NL31     | genital | F | Netherlands | F | 2001 | endocervix 2566  | ERR189762 | ERS153039 - | -              |
| F_NL35     | genital | F | Netherlands | F | 2001 | endocervix 2566  | ERR211022 | ERS161072 - | -              |
| F_NL36     | genital | F | Netherlands | F | 2001 | endocervix 2566  | ERR189726 | ERS153003 - | -              |
| F_NL38     | genital | F | Netherlands | F | 2001 | endocervix 2566  | ERR278184 | ERS200113 - | -              |
| F_R4663    | genital | F | Russia      | F | 2011 | endocervix 2566  | ERR140795 | ERS095065 - | -              |
| F_R7369    | genital | F | Russia      | F | 2011 | endocervix 2566  | ERR140798 | ERS095068 - | -              |
| F_R12921   | genital | F | Russia      | F | 2011 | endocervix 2566  | ERR140799 | ERS095069 - | -              |
| F_R28312   | genital | F | Russia      | M | 2010 | urethra 2566     | ERR111597 | ERS075220 - | -              |
| F_S1470    | genital | F | Sweden      | F | 2010 | endocervix 2566  | ERR108292 | ERS082974 - | -              |
| F_S1494    | genital | F | Sweden      | F | 2010 | endocervix 2566  | ERR140811 | ERS095081 - | -              |
| F_S2430    | genital | F | Sweden      | M | 2010 | urethra 2566     | ERR111583 | ERS075206 - | -              |
| F_S2526    | genital | F | Sweden      | F | 2010 | unknown 2566     | ERR111577 | ERS075200 - | -              |
| F_S2595    | genital | F | Sweden      | F | 2010 | endocervix 2566  | ERR108283 | ERS082965 - | -              |
| F_S3948    | genital | F | Sweden      | F | 2010 | endocervix 2566  | ERR140800 | ERS095070 - | -              |
| F_S4410    | genital | F | Sweden      | F | 2010 | endocervix 2566  | ERR111593 | ERS075216 - | -              |
| F_SF7      | genital | F | USA         | F | 2003 | endocervix 2566  |           |             | Samboonna 2019 |
| F_SF8      | genital | F | USA         | F | 2003 | endocervix 2566  |           |             | Samboonna 2019 |
| F_SF10     | genital | F | USA         | F | 2003 | endocervix 2574  |           |             | Samboonna 2019 |
| F_SF11     | genital | F | USA         | F | 2003 | endocervix 2580  |           |             | Samboonna 2019 |
| F_SF14     | genital | F | USA         | F | 2003 | endocervix 2574  |           |             | Samboonna 2019 |
| F_SF16     | genital | F | USA         | F | 2003 | endocervix 2566  |           |             | Samboonna 2019 |
| F_SF19     | genital | F | USA         | F | 2003 | endocervix 2566  |           |             | Samboonna 2019 |
| F_SF21     | genital | F | USA         | F | 2003 | endocervix 2574  |           |             | Samboonna 2019 |
| F_Soton18  | genital | F | UK          | F | 2009 | endocervix 2566  | ERR026569 | ERS013808 - | -              |
| F_Soton48  | genital | F | UK          | F | 2009 | endocervix 2566  | ERR140820 | ERS095090 - | -              |
| F_Soton88  | genital | F | UK          | F | 2009 | endocervix 2566  | ERR026581 | ERS013818 - | -              |
| F_Soton106 | genital | F | UK          | F | 2009 | endocervix 2566  | ERR140824 | ERS095094 - | -              |
| F_Soton118 | genital | F | UK          | F | 2009 | endocervix 2566  | ERR140825 | ERS095095 - | -              |
| F_Soton137 | genital | F | UK          | F | 2009 | endocervix 2566  | ERR140827 | ERS095097 - | -              |

|            |         |   |           |   |           |            |      |           |           |          |                 |
|------------|---------|---|-----------|---|-----------|------------|------|-----------|-----------|----------|-----------------|
| F_SotonF1  | genital | F | UK        | F | 2009      | endocervix | 2566 | ERR026556 | ERS013796 | -        | -               |
| F_SotonF2  | genital | F | UK        | F | 2009      | endocervix | 2566 | ERR026557 | ERS013797 | -        | -               |
| F_SotonF3  | genital | F | UK        | F | 2009      | endocervix | 2566 | ERR027330 | ERS008764 | HE603234 | Harris 2012     |
| F_SotonF4  | genital | F | UK        | F | 2009      | endocervix | 2566 | ERR026558 | ERS013798 | -        | -               |
| F_Sou9     | genital | F | UK        |   | 1985      | unknown    | 2566 | ERR189771 | ERS153048 | -        | -               |
| F_Sou87    | genital | F | UK        |   | 1985      | unknown    | 2566 | ERR211005 | ERS161055 | -        | -               |
| F_Sou89    | genital | F | UK        | F |           | unknown    | 2566 | ERR211006 | ERS161056 | -        | -               |
| F_Sou100   | genital | F | UK        | M |           | unknown    | 2566 | ERR211009 | ERS161059 | -        | -               |
| F_STN15    | genital | F | UK        |   | 1985      | unknown    | 2566 | ERR658578 | ERS208558 | -        | -               |
| F_STN22    | genital | F | UK        |   | 1985      | unknown    | 2566 | ERR658580 | ERS208560 | -        | -               |
| F_STN110   | genital | F | UK        |   | 1985      | unknown    | 2566 | ERR658585 | ERS208566 | -        | -               |
| F_SW4      | genital | F | Sweden    | F | 2002      | endocervix | 2566 | ERR008588 | ERS001414 | FM865441 | Harris 2012     |
| F_SW5      | genital | F | Sweden    | F | 2002      | endocervix | 2566 | ERR008582 | ERS001415 | FM865442 | Harris 2012     |
| F_Swab5    | genital | F | UK        | F | 2010      | vagina     | 2566 | ERR024700 | ERS013115 | -        | Seth-Smith 2013 |
| F_SwabB1   | genital | F | UK        | F | 2010      | vagina     | 2566 | ERR173901 | ERS177788 | -        | Seth-Smith 2013 |
| F_SwabB8   | genital | F | UK        | F | 2010      | vagina     | 2566 | ERR034346 | ERS015772 | -        | Seth-Smith 2013 |
| F_SWFP     | genital | F | Sweden    | F | 2009      | endocervix | 2566 | ERR008598 | ERS001400 | -        | -               |
| F_UK35155  | genital | F | UK        | F | 2012      | Cx/Urethra | 2566 | ERR658626 | ERS208353 | -        | -               |
| F_UK220521 | genital | F | UK        | M | 2012      | urethra    | 2566 | ERR658399 | ERS160285 | -        | -               |
| F_UK465966 | genital | F | UK        | F | 2012      | Cx/Urethra | 2566 | ERR658632 | ERS208359 | -        | -               |
| F_UK466273 | genital | F | UK        | F | 2012      | Cx/Urethra | 2566 | ERR658592 | ERS208319 | -        | -               |
| F_UK583012 | genital | F | UK        | F | 2012      | Cx/Urethra | 2566 | ERR658656 | ERS208383 | -        | -               |
| F_UK583072 | genital | F | UK        | F | 2012      | Cx/Urethra | 2566 | ERR658652 | ERS208379 | -        | -               |
| F_UK583468 | genital | F | UK        | F | 2012      | Cx/Urethra | 2566 | ERR658649 | ERS208376 | -        | -               |
| F_UK584026 | genital | F | UK        | F | 2012      | Cx/Urethra | 2566 | ERR658647 | ERS208374 | -        | -               |
| F_UK663442 | genital | F | UK        | M | 2012      | urethra    | 2566 | ERR658664 | ERS208391 | -        | -               |
| F_UK770010 | genital | F | UK        | F | 2012      | Cx/Urethra | 2566 | ERR658672 | ERS208399 | -        | -               |
| G_9301     | genital | G | 0         | M |           | urethra    | 2566 | -         | -         | CP001930 | Jeffrey 2010    |
| G_9768     | genital | G | 0         | M |           | rectum     | 2566 | -         | -         | CP001887 | Jeffrey 2010    |
| G_11074    | genital | G | 0         | M |           | rectum     | 2566 | -         | -         | CP001889 | Jeffrey 2010    |
| G_11222    | genital | G | 0         | F |           | endocervix | 2566 | -         | -         | CP001888 | Jeffrey 2010    |
| G_Ar112    | genital | G | Argentina | M | 2007      | urethra    | 2566 | ERR111635 | ERS082952 | -        | -               |
| G_Ar246    | genital | G | Argentina | M | 2007      | urethra    | 2566 | ERR108276 | ERS082958 | -        | -               |
| G_Aus1     | genital | G | Australia |   | 1986-1989 | unknown    | 2566 | ERR189741 | ERS153018 | -        | Andersson 2016  |
| G_Aus16    | genital | G | Australia |   | 1986-1989 | unknown    | 2566 | ERR189751 | ERS153028 | -        | Andersson 2016  |
| G_Aus17    | genital | G | Australia |   | 1986-1989 | unknown    | 2566 | ERR189752 | ERS153029 | -        | Andersson 2016  |
| G_Aus18    | genital | G | Australia |   | 1986-1989 | unknown    | 2566 | ERR189759 | ERS153036 | -        | Andersson 2016  |
| G_Aus19    | genital | G | Australia |   | 1986-1989 | unknown    | 2566 | ERR189760 | ERS153037 | -        | Andersson 2016  |
| G_Fin144   | genital | G | Finland   | F | 2010      | endocervix | 2566 | ERR278137 | ERS200066 | -        | -               |
| G_Fin153   | genital | G | Finland   | F | 2010      | endocervix | 2566 | ERR278140 | ERS200069 | -        | -               |
| G_Fin158   | genital | G | Finland   | F | 2010      | endocervix | 2566 | ERR278142 | ERS200071 | -        | -               |

|            |         |   |             |   |      |                  |           |           |   |                 |
|------------|---------|---|-------------|---|------|------------------|-----------|-----------|---|-----------------|
| G_Fin205   | genital | G | Finland     | F | 2011 | endocervix 2566  | ERR278188 | ERS200117 | - | -               |
| G_NL39     | genital | G | Netherlands | F | 2001 | endocervix 2566  | ERR189764 | ERS153041 | - | -               |
| G_NL40     | genital | G | Netherlands | F | 2001 | endocervix 2566  | ERR189729 | ERS153006 | - | -               |
| G_NL41     | genital | G | Netherlands | F | 2001 | endocervix 2566  | ERR210971 | ERS161021 | - | -               |
| G_NL42     | genital | G | Netherlands | F | 2001 | endocervix 2566  | ERR210972 | ERS161022 | - | -               |
| G_NL43     | genital | G | Netherlands | F | 2001 | endocervix 2566  | ERR189730 | ERS153007 | - | -               |
| G_NL44     | genital | G | Netherlands | F | 2001 | endocervix 2566  | ERR278214 | ERS200143 | - | -               |
| G_NL45     | genital | G | Netherlands | F | 2001 | endocervix 2566  | ERR189732 | ERS153009 | - | -               |
| G_NL46     | genital | G | Netherlands | F | 2001 | endocervix 2566  | ERR189733 | ERS153010 | - | -               |
| G_NL47     | genital | G | Netherlands | F | 2001 | endocervix 2566  | ERR210973 | ERS161023 | - | -               |
| G_NL48     | genital | G | Netherlands | F | 2001 | endocervix 2566  | ERR189734 | ERS153011 | - | -               |
| G_R297     | genital | G | Russia      | F | 2011 | endocervix 2566  | ERR111576 | ERS075199 | - | -               |
| G_R459     | genital | G | Russia      | F | 2011 | endocervix 2566  | ERR111617 | ERS082934 | - | -               |
| G_R2247    | genital | G | Russia      | F | 2011 | endocervix 2566  | ERR111620 | ERS082937 | - | -               |
| G_R3059    | genital | G | Russia      | F | 2011 | endocervix 2566  | ERR111612 | ERS082929 | - | Seth-Smith 2013 |
| G_R4175    | genital | G | Russia      | F | 2011 | endocervix 2566  | ERR111614 | ERS082931 | - | Seth-Smith 2013 |
| G_R9069    | genital | G | Russia      | F | 2011 | endocervix 2566  | ERR111625 | ERS082942 | - | -               |
| G_R9892    | genital | G | Russia      | M | 2011 | urethra 2566     | ERR111619 | ERS082936 | - | -               |
| G_R15108   | genital | G | Russia      | M | 2011 | urethra 2566     | ERR140756 | ERS095026 | - | -               |
| G_R23736   | genital | G | Russia      | F | 2010 | endocervix 2566  | ERR111595 | ERS075218 | - | -               |
| G_R27757   | genital | G | Russia      | F | 2010 | endocervix 2566  | ERR111623 | ERS082940 | - | -               |
| G_R30591   | genital | G | Russia      | F | 2010 | endocervix 2566  | ERR111569 | ERS075192 | - | -               |
| G_R31458   | genital | G | Russia      | M | 2010 | urethra 2566     | ERR111605 | ERS082922 | - | -               |
| G_R35506   | genital | G | Russia      | F | 2010 | endocervix 2566  | ERR111610 | ERS082927 | - | -               |
| G_R36176   | genital | G | Russia      | F | 2010 | endocervix 2566  | ERR111611 | ERS082928 | - | Seth-Smith 2013 |
| G_S1471    | genital | G | Sweden      | F | 2010 | endocervix 2566  | ERR108291 | ERS082973 | - | -               |
| G_S1824    | genital | G | Sweden      | F | 2010 | endocervix 2566  | ERR111587 | ERS075210 | - | -               |
| G_S1846    | genital | G | Sweden      | F | 2010 | endocervix 2566  | ERR140807 | ERS095077 | - | -               |
| G_S2477    | genital | G | Sweden      | F | 2010 | endocervix 2566  | ERR140814 | ERS095084 | - | -               |
| G_S2956    | genital | G | Sweden      | F | 2010 | conjunctiv: 2566 | ERR111581 | ERS075204 | - | -               |
| G_S3270    | genital | G | Sweden      | F | 2010 | endocervix 2566  | ERR111588 | ERS075211 | - | -               |
| G_S3344    | genital | G | Sweden      | F | 2010 | endocervix 2566  | ERR111591 | ERS075214 | - | -               |
| G_S4641    | genital | G | Sweden      | F | 2010 | endocervix 2566  | ERR140813 | ERS095083 | - | -               |
| G_S4658    | genital | G | Sweden      | M | 2010 | conjunctiv: 2566 | ERR108295 | ERS082977 | - | -               |
| G_SF20     | genital | G | USA         | F | 2003 | endocervix 2566  |           |           |   | This study      |
| G_SF21     | genital | G | USA         | F | 2003 | endocervix 2566  |           |           |   | This study      |
| G_Soton144 | genital | G | UK          | F | 2009 | endocervix 2566  | ERR140828 | ERS095098 | - | -               |
| G_SotonG1  | genital | G | UK          | F | 2009 | endocervix 2566  | ERR026560 | ERS013800 | - | Harris 2012     |
| G_UK221405 | genital | G | UK          |   |      | unknown          | ERR658523 | ERS160283 |   |                 |
| G_UK582506 | genital | G | UK          | M | 2012 | urethra 2566     | ERR658658 | ERS208385 | - | -               |
| G_UK750365 | genital | G | UK          | F | 2012 | endocervix 2566  | ERR658369 | ERS160255 | - | -               |

|             |         |      |              |   |      |                 |           |           |          |             |
|-------------|---------|------|--------------|---|------|-----------------|-----------|-----------|----------|-------------|
| G_UK913362  | genital | G    | UK           | F | 2012 | Cx/Urethra 2566 | ERR658677 | ERS208404 | -        | -           |
| G_UW57      | genital | G    | USA          |   | 1971 | endocervix 2566 | ERR164658 | ERS133245 | -        | Joseph 2012 |
| H_Fin109    | genital | H    | Finland      | F | 2010 | endocervix 2566 | ERR278213 | ERS200142 | -        | -           |
| H_NL49      | genital | H    | Netherlands  | F | 2001 | endocervix 2566 | ERR210974 | ERS161024 | -        | -           |
| H_NL50      | genital | H    | Netherlands  | F | 2001 | endocervix 2566 | ERR210975 | ERS161025 | -        | -           |
| H_NL51      | genital | H    | Netherlands  | F | 2001 | endocervix 2566 | ERR210976 | ERS161026 | -        | -           |
| H_NL53      | genital | H    | Netherlands  | F | 2001 | endocervix 2566 | ERR210978 | ERS161028 | -        | -           |
| H_NL54      | genital | H    | Netherlands  | F | 2001 | endocervix 2566 | ERR210979 | ERS161029 | -        | -           |
| H_NL56      | genital | H    | Netherlands  | F | 2001 | endocervix 2566 | ERR210981 | ERS161031 | -        | -           |
| H_R13670    | genital | H    | Russia       | M | 2011 | urethra 2566    | ERR164654 | ERS133241 | -        | -           |
| H_R25308    | genital | H    | Russia       | F | 2010 | endocervix 2566 | ERR111616 | ERS082933 | -        | -           |
| H_R27887    | genital | H    | Russia       | F | 2010 | endocervix 2566 | ERR111599 | ERS075222 | -        | -           |
| H_R31975    | genital | H    | Russia       | F | 2010 | endocervix 2566 | ERR111606 | ERS082923 | -        | -           |
| H_S269      | genital | H    | Sweden       | F | 2011 | unknown 2566    | ERR164646 | ERS133233 | -        | -           |
| H_S1026     | genital | H    | Sweden       | F | 2010 | endocervix 2566 | ERR108301 | ERS082983 | -        | -           |
| H_S1314     | genital | H    | Sweden       | F | 2010 | endocervix 2566 | ERR108296 | ERS082978 | -        | -           |
| H_S1432     | genital | H    | Sweden       | F | 2010 | endocervix 2566 | ERR108303 | ERS082985 | -        | -           |
| H_S4377     | genital | H    | Sweden       | F | 2010 | endocervix 2566 | ERR164648 | ERS133235 | -        | -           |
| H_UW4       | genital | H    | USA          | F | 1965 | endocervix 2566 | ERR558497 | ERS177776 | -        | Joseph 2012 |
| H_UW4       | genital | H    | USA          | F | 1965 | endocervix 2566 | ERR558497 | ERS177776 | -        | Joseph 2012 |
| Ia_20-97    | genital | I-Ia | USA          |   |      | endocervix 2566 | -         | -         | CP006678 | Putman 2013 |
| Ia/CS190/96 |         | I-Ia |              | F | 2015 | endocervix      |           |           | CP010571 | Borges 2015 |
| Ia_SF16     | genital | Ia   | USA          | F | 2003 | endocervix 2566 |           |           |          |             |
| Ia_SF25     | genital | Ia   | USA          | F | 2003 | endocervix 2566 |           |           |          |             |
| Ia_SF27     | genital | Ia   | USA          | F | 2003 | endocervix 2566 |           |           |          |             |
| Ia_SotonIa1 | genital | I-Ia | UK           | F | 2009 | endocervix 2566 | ERR026555 | ERS013804 | HE603236 | Harris 2012 |
| Ia_SotonIa3 | genital | I-Ia | UK           | F | 2009 | endocervix 2566 | ERR026565 | ERS013805 | HE603237 | Harris 2012 |
| Ia_UW202    | genital | I-Ia | USA          |   |      | unknown         |           |           |          | This study  |
| I_NL58      | genital | I-Ia | Netherlands  | F | 2001 | endocervix 2566 | ERR210982 | ERS161032 | -        | -           |
| I_NL63      | genital | I-Ia | Netherlands  | F | 2001 | endocervix 2566 | ERR210985 | ERS161035 | -        | -           |
| I_NL66      | genital | I-Ia | Netherlands  | F | 2001 | endocervix 2566 | ERR211026 | ERS161076 | -        | -           |
| I_NL67      | genital | I-Ia | Netherlands  | F | 2001 | endocervix 2566 | ERR210986 | ERS161036 | -        | -           |
| I_NL69      | genital | I-Ia | Netherlands  | F | 2001 | endocervix 2566 | ERR211023 | ERS161073 | -        | -           |
| I_NL70      | genital | I-Ia | Netherlands  | F | 2001 | endocervix 2566 | ERR210987 | ERS161037 | -        | -           |
| I_NL72      | genital | I-Ia | Netherlands  | F | 2001 | endocervix 2566 | ERR211027 | ERS161077 | -        | -           |
| I_S2459     | genital | I-Ia | Sweden       | F | 2010 | endocervix 2566 | ERR111592 | ERS075215 | -        | -           |
| I_UK913341  | genital | I-Ia | UK           | F | 2012 | vagina 2566     | ERR658613 | ERS208340 |          |             |
| I_UW12      | genital | I-Ia | USA          |   | 1966 | urethra 2566    | ERR278215 | ERS200144 | -        | -           |
| Ja/UW-92    | genital | Ja   | Seattle, USA |   | 1992 | unknown 2566    |           |           |          | This study  |
| J_27-97     | genital | J    | USA          |   |      | endocervix 2566 | -         | -         | CP006679 | Putman 2013 |
| J_31-98     | genital | J    | USA          |   |      | endocervix 2566 | -         | -         | CP006680 | Putman 2013 |

|            |         |   |             |   |      |                 |           |           |              |              |
|------------|---------|---|-------------|---|------|-----------------|-----------|-----------|--------------|--------------|
| J_6276     | genital | J | 0           | F |      | endocervix 2566 | -         | -         | ABYD01000001 | Jeffrey 2010 |
| J_6276s    | genital |   |             |   |      | endocervix 2566 |           |           | ABYD01000002 | Jeffrey 2010 |
| J_C114     | genital | J | UK          | F | 2011 | vagina 2566     | ERR175629 | ERS177815 | -            | -            |
| J_NL55     | genital | J | Netherlands | F | 2001 | endocervix 2566 | ERR210980 | ERS161030 | -            | -            |
| J_NL76     | genital | J | Netherlands | F | 2001 | endocervix 2566 | ERR210989 | ERS161039 | -            | -            |
| J_NL78     | genital | J | Netherlands | F | 2001 | endocervix 2566 | ERR210990 | ERS161040 | -            | -            |
| J_S42      | genital | J | Sweden      | F | 2011 | endocervix 2566 | ERR140818 | ERS095088 | -            | -            |
| J_S178     | genital | J | Sweden      | F | 2011 | endocervix 2566 | ERR140829 | ERS095099 | -            | -            |
| J_S1254    | genital | J | Sweden      | F | 2010 | endocervix 2566 | ERR108302 | ERS082984 | -            | -            |
| J_S3107    | genital | J | Sweden      | F | 2010 | endocervix 2566 | ERR108299 | ERS082981 | -            | -            |
| J_S4281    | genital | J | Sweden      | F | 2010 | endocervix 2566 | ERR108300 | ERS082982 | -            | -            |
| J_S4821    | genital | J | Sweden      | F | 2010 | endocervix 2566 | ERR164649 | ERS133236 | -            | -            |
| J_SF5      | genital | J | USA         | F | 2003 | endocervix 2566 |           |           |              | This study   |
| J_SF6      | genital | J | USA         | F | 2003 | endocervix 2566 |           |           |              | This study   |
| J_Sou106   | genital | J | UK          | F | 1985 | unknown 2566    | ERR211013 | ERS161063 | -            | -            |
| J_UK583676 | genital | J | UK          | M | 2012 | urethra 2566    | ERR658657 | ERS208384 | -            | -            |
| J_UK913454 | genital | J | UK          | M | 2012 | urethra 2566    | ERR658679 | ERS208406 | -            | -            |
| J_UW36     | genital | J | USA         | F | 1971 | endocervix 2566 | ERR558504 | ERS177783 | -            | -            |
| K_Ar74     | genital | K | Argentina   | F | 2005 | ocular 2566     | ERR658565 | ERS208545 | -            | -            |
| K_Ar650    | genital | K | Argentina   | M | 2006 | urethra 2566    | ERR658566 | ERS208546 | -            | -            |
| K_Fin128   | genital | K | Finland     | F | 2010 | endocervix 2566 | ERR278186 | ERS200115 | -            | -            |
| K_Fin139   | genital | K | Finland     | F | 2010 | endocervix 2566 | ERR278163 | ERS200092 | -            | -            |
| K_Fin202   | genital | K | Finland     | F | 2011 | endocervix 2566 | ERR278164 | ERS200093 | -            | -            |
| K_Fin204   | genital | K | Finland     | F | 2011 | endocervix 2566 | ERR278165 | ERS200094 | -            | -            |
| K_NL81     | genital | K | Netherlands | F | 2001 | endocervix 2566 | ERR211028 | ERS161078 | -            | -            |
| K_NL82     | genital | K | Netherlands | F | 2001 | endocervix 2566 | ERR211024 | ERS161074 | -            | -            |
| K_NL83     | genital | K | Netherlands | F | 2001 | endocervix 2566 | ERR211029 | ERS161079 | -            | -            |
| K_NL84     | genital | K | Netherlands | F | 2001 | endocervix 2566 | ERR211025 | ERS161075 | -            | -            |
| K_NL85     | genital | K | Netherlands | F | 2001 | endocervix 2566 | ERR210991 | ERS161041 | -            | -            |
| K_NL87     | genital | K | Netherlands | F | 2001 | endocervix 2566 | ERR211030 | ERS161080 | -            | -            |
| K_R2084    | genital | K | Russia      | F | 2011 | endocervix 2566 | ERR111622 | ERS082939 | -            | -            |
| K_R11642   | genital | K | Russia      | F | 2011 | endocervix 2566 | ERR140839 | ERS095109 | -            | -            |
| K_R13207   | genital | K | Russia      | F | 2011 | endocervix 2566 | ERR140836 | ERS095106 | -            | -            |
| K_R14876   | genital | K | Russia      | M | 2011 | urethra 2566    | ERR140838 | ERS095108 | -            | -            |
| K_R15212   | genital | K | Russia      | F | 2011 | endocervix 2566 | ERR140840 | ERS095110 | -            | -            |
| K_R26881   | genital | K | Russia      | F | 2010 | endocervix 2566 | ERR111626 | ERS082943 | -            | -            |
| K_R27128   | genital | K | Russia      | F | 2010 | endocervix 2563 | ERR111629 | ERS082946 | -            | -            |
| K_R32840   | genital | K | Russia      | F | 2010 | endocervix 2566 | ERR111627 | ERS082944 | -            | -            |
| K_R34345   | genital | K | Russia      | F | 2010 | endocervix 2566 | ERR111609 | ERS082926 | -            | -            |
| K_R34962   | genital | K | Russia      | M | 2010 | urethra 2566    | ERR111608 | ERS082925 | -            | -            |
| K_R35248   | genital | K | Russia      | M | 2010 | urethra 2566    | ERR111628 | ERS082945 | -            | -            |

|             |         |     |              |   |      |               |      |           |           |          |                 |
|-------------|---------|-----|--------------|---|------|---------------|------|-----------|-----------|----------|-----------------|
| K_S143      | genital | K   | Sweden       | F | 2011 | endocervix    | 2566 | ERR108304 | ERS082986 | -        | -               |
| K_S4034     | genital | K   | Sweden       | F | 2010 | endocervix    | 2566 | ERR164647 | ERS133234 | -        | -               |
| K_S4229     | genital | K   | Sweden       | F | 2010 | urethra       | 2566 | ERR111584 | ERS075207 | -        | -               |
| K_SotonK1   | genital | K   | UK           | F | 2009 | endocervix    | 2566 | ERR026559 | ERS013799 | HE603238 | Harris 2012     |
| K_UK583237  | genital | K   | UK           | F | 2012 | Cx/Urethra    | 2566 | ERR658600 | ERS208327 | -        | -               |
| K_UK663066  | genital | K   | UK           | F | 2012 | Cx/Urethra    | 2566 | ERR658662 | ERS208389 | -        | -               |
| K_UK663124  | genital | K   | UK           | F | 2012 | Cx/Urethra    | 2566 | ERR658660 | ERS208387 | -        | -               |
| K_UK769075  | genital | K   | UK           | F | 2012 | Urine         | 2566 | ERR658561 | ERS208541 | -        | -               |
| K_UW31      | genital | K   | USA          | F | 1973 | endocervix    | 2566 | ERR558505 | ERS177784 | -        | -               |
| L1_L82      | LGV     | L1  | South Africa | M | 1985 | urethra       | 2566 | ERR211057 | ERS161107 | -        | -               |
| L1_L115p10  | LGV     | L1  | South Africa | M | 1986 | urethra       | 2566 | ERR211062 | ERS161112 | -        | -               |
| L1_L146     | LGV     | L1  | South Africa | M | 1986 | ulcer         | 2566 | ERR211044 | ERS161094 | -        | -               |
| L1_L165     | LGV     | L1  | South Africa | M | 1986 | ulcer         | 2566 | ERR211045 | ERS161095 | -        | -               |
| L1_L224     | LGV     | L1  | South Africa | M | 1986 | urethra       | 2566 | ERR211058 | ERS161108 | -        | -               |
| L1_L232     | LGV     | L1  | South Africa | M | 1987 | urethra       | 2566 | ERR211059 | ERS161109 | -        | -               |
| L1_L246     | LGV     | L1  | South Africa | M | 1987 | urethra       | 2566 | ERR211046 | ERS161096 | -        | -               |
| L1_L867     | LGV     | L1  | South Africa | M | 1993 | urethra       | 2566 | ERR211060 | ERS161110 | -        | -               |
| L1_L942     | LGV     | L1  | South Africa | M | 1994 | urethra       | 2566 | ERR211061 | ERS161111 | -        | -               |
| L1_L1034    | LGV     | L1  | South Africa | M | 1994 | urethra       | 2566 | ERR211035 | ERS161085 | -        | -               |
| L1_LGV98    | LGV     | L1  | South Africa | M |      | unknown       | 2566 | ERR071990 | ERS066953 | -        | Seth-Smith 2013 |
| L1_LGV913   | LGV     | L1  | South Africa | M |      | unknown       | 2566 | ERR071991 | ERS066954 | -        | Seth-Smith 2013 |
| L1_SA160    | LGV     | L1  | South Africa | M | 1986 | ulcer         | 2566 | ERR658551 | ERS208531 | -        | -               |
| L1_SA409    | LGV     | L1  | South Africa | M | 1990 | ulcer         | 2566 | ERR658553 | ERS208533 | -        | -               |
| L1_SABY216  | LGV     | L1  | South Africa | M | 1999 | ulcer         | 2566 | ERR658549 | ERS208529 | -        | -               |
| L1_115      | LGV     | L1  | South Africa |   |      | unknown       | 2566 | ERR008593 | ERS001411 | HE603218 | Harris 2012     |
| L1_224      | LGV     | L1  | South Africa |   |      | unknown       | 2566 | ERR008580 | ERS001404 | HE603220 | Harris 2012     |
| L1_440      | LGV     | L1  | USA          | M | 1968 | lymph nod     | 2566 | ERR008595 | ERS001396 |          | Harris 2012     |
| L1_1333p2   | LGV     | L2  | South Africa | M |      | genital ulcer | 2566 |           |           | HE601951 |                 |
| L1_Ur583806 | LGV     | L1  | UK           | M | 2012 | Urine         | 2566 | ERR658557 | ERS208537 | HE603228 | Harris 2012     |
| L2b_795     | LGV     | L2b | France       | M | 2004 | rectum        | 2566 | ERR008586 | ERS001409 |          | Harris 2012     |
| L2b_8200    | LGV     | L2b | Sweden       | M | 2007 | proctitis     | 2566 | ERR021952 | ERS004108 |          | Harris 2012     |
| L2b_8200-07 | LGV     | L2b | Sweden       | M | 2007 | proctitis     | 2566 | ERR021952 | ERS004108 |          | Harris 2012     |
| L2b_Ams1    | LGV     | L2b | Netherlands  | M | 2004 | penile ulce   | 2566 |           |           | HE601959 | Harris 2012     |
| L2b_Ams2    | LGV     | L2b | Netherlands  | M | 2005 | anus          | 2566 |           |           | HE601961 | Harris 2012     |
| L2b_Ams3    | LGV     | L2b | Netherlands  | M | 2004 | anus          | 2566 |           |           | HE601962 | Harris 2012     |
| L2b_Ams4    | LGV     | L2b | Netherlands  | M | 2005 | anus          | 2566 |           |           | HE601964 | Harris 2012     |
| L2b_Ams5    | LGV     | L2b | Netherlands  | M | 2004 | anus          | 2566 |           |           | HE601965 | Harris 2012     |
| L2b_C1      | LGV     | L2b | Canada       | M | 2004 | rectum        | 2566 | ERR008579 | ERS001398 |          | Harris 2012     |
| L2b_C2      | LGV     | L2b | Canada       | M | 2005 | rectum        | 2566 | ERR008592 | ERS001399 |          | Harris 2012     |
| L2b_Canada1 | LGV     | L2b | Canada       | M | 2004 | rectum        | 2566 |           |           | HE601963 | Harris 2012     |
| L2b_Canada2 | LGV     | L2b | Canada       | M | 2005 | rectum        | 2566 |           |           | HE601957 | Harris 2012     |

|             |     |     |              |   |       |             |      |           |           |          |                 |
|-------------|-----|-----|--------------|---|-------|-------------|------|-----------|-----------|----------|-----------------|
| L2b_CC37    | LGV | L2b | UK           | M | 2011  | rectum      | 2566 | ERR140847 | ERS095117 |          | Harris 2012     |
| L2b_CS1908  | LGV | L2b | Portugal     | M | 2015  | anorectal   | 2566 |           |           | CP009923 | Borges 2015     |
| L2b_CS7840  | LGV | L2b | Portugal     |   | 2015  | proctitis   | 2566 |           |           | CP009925 | Borges 2016     |
| L2b_CV204   | LGV | L2b | France       | M | 2006  | rectum      | 2566 | ERR019531 | ERS003307 |          | Harris 2012     |
| L2b_H17IMS  | LGV | L2b | UK           | M | 2008  | rectum      | 2566 | ERR140766 | ERS095036 |          |                 |
| L2b_HPA1    | LGV | L2b | UK           | M | 2005  | rectum      | 2566 | ERR164659 | ERS133246 |          |                 |
| L2b_HPA21   | LGV | L2b | UK           | M | 2009  | rectum      | 2566 | ERR140767 | ERS095037 |          |                 |
| L2b_HPA27   | LGV | L2b | UK           | M | 2005  | rectum      | 2566 | ERR164661 | ERS133248 |          |                 |
| L2b_HPA29   | LGV | L2b | UK           | M | 2004  | rectum      | 2566 | ERR164662 | ERS133249 |          |                 |
| L2b_HPA31   | LGV | L2b | UK           | M | 2005  | rectum      | 2566 | ERR164663 | ERS133250 |          | Thomson 2008    |
| L2b_HPA34   | LGV | L2b | UK           | M | 2008  | rectum      | 2566 | ERR164665 | ERS133252 |          | Harris 2012     |
| L2b_LST     | LGV | L2b | France       | M | 2008  | rectum      | 2566 | ERR019528 | ERS003315 |          | Somboonna 2011  |
| L2b_s11     | LGV | L2b | Netherlands  | M | 2004  | penile ulce | 2566 | ERR008590 | ERS001408 | HE603228 | Harris 2012     |
| L2b_s121    | LGV | L2b | Netherlands  | M | 2005  | anal swab   | 2566 | ERR008597 | ERS001402 |          |                 |
| L2b_s300    | LGV | L2b | Netherlands  | M | 2004  | anal swab   | 2566 | ERR008599 | ERS001413 |          |                 |
| L2b_s750    | LGV | L2b | Netherlands  | M | 2004  | anal swab   | 2566 | ERR008594 | ERS001410 |          |                 |
| L2b_s906    | LGV | L2b | Netherlands  | M | 2005  | anal swab   | 2566 | ERR008584 | ERS001395 |          |                 |
| L2b_SF4180  | LGV | L2b | USA          | M | 1984  | rectum      | 2566 | ERR348840 | ERS248048 |          |                 |
| L2b_SF4644  | LGV | L2b | USA          | M | 1985  | rectum      | 2566 | ERR348841 | ERS248049 |          |                 |
| L2b_SF1565  | LGV | L2b | USA          | M | 2001  | rectum      | 2566 | ERR516390 | ERS373084 |          |                 |
| L2b_SF1567  | LGV | L2b | USA          | M | 2003  | rectum      | 2566 | ERR516391 | ERS373085 |          |                 |
| L2b_SF1567  | LGV | L2b | USA          | M | 2003  | rectum      | 2566 | ERR348858 | ERS248080 |          |                 |
| L2b_UCH1    | LGV | L2b | UK           | M | 2006  | proctitis   | 2566 | ERR008581 | ERS001407 |          |                 |
| L2b_UCH2    | LGV | L2b | UK           |   |       | proctitis   | 2566 | ERR008587 | ERS001405 |          |                 |
| L2c         | LGV | L2  | USA          | M | 2000s | rectum      | 2566 |           |           | CP002024 | Somboonna 2011  |
| L2_L198     | LGV | L2  | South Africa | M | 1986  | ulcer       | 2566 | ERR211050 | ERS161100 |          | Seth-Smith 2013 |
| L2_L694     | LGV | L2  | South Africa | M | 1993  | urethra     | 2566 | ERR211064 | ERS161114 |          | Seth-Smith 2014 |
| L2_LGV173   | LGV | L2  | South Africa | M |       | NA          | 2566 | ERR071989 | ERS066952 |          | Seth-Smith 2015 |
| L2_SF25667  | LGV | L2  | USA          | M | 1981  | rectum      | 2566 | ERR351533 | ERS248067 |          | Seth-Smith 2016 |
| L2_SF40369  | LGV | L2  | USA          | M | 1984  | rectum      | 2566 | ERR348839 | ERS248047 |          | Seth-Smith 2017 |
| L2_SFUW39   | LGV | L2  | USA          | M | 1980s | rectum      | 2566 | ERR348842 | ERS248050 |          | Seth-Smith 2018 |
| L2_434Bu    | LGV | L2  | USA          | M | 1968  | bubo        | 2566 |           |           | AM884176 | Harris 2012     |
| L2_434Bu(f) | LGV | L2  | USA          | M | 1968  | inguinal b  | 2566 |           |           | CP003963 |                 |
| L2_434Bu(i) | LGV | L2  | USA          | M | 1968  | inguinal b  | 2566 |           |           | CP003965 |                 |
| L2_470LN87  | LGV | L2  | USA          | M | 1968  | lymph nod   | 2566 | ERR348847 | ERS248055 |          | Harris 2012     |
| L2_514BU11  | LGV | L2  | USA          | M | 1968  | bubo        | 2566 | ERR348844 | ERS248052 |          |                 |
| L2_526BU5   | LGV | L2  | USA          | M | 1968  | bubo        | 2566 | ERR516392 | ERS373086 |          | Harris 2012     |
| L3_404      | LGV | L3  | USA          | M | 1967  | lymph nod   | 2576 | ERR008583 | ERS001416 | HE601955 |                 |
