# Supplementary material for: Tryptophan Operon Diversity Reveals Evolutionary Trends among Geographically Disparate Chlamydia trachomatis Ocular and Urogenital Strains Affecting Tryptophan Repressor and Synthase Function
Source: PubMed Central journal article supplement (PMC8262981; doi:10.1128/mbio.00605-21), 2021-05-11
Supplement: mbio.00605-21-sf001.pdf [file mbio.00605-21-sf001.pdf]

## Supplementary Figures

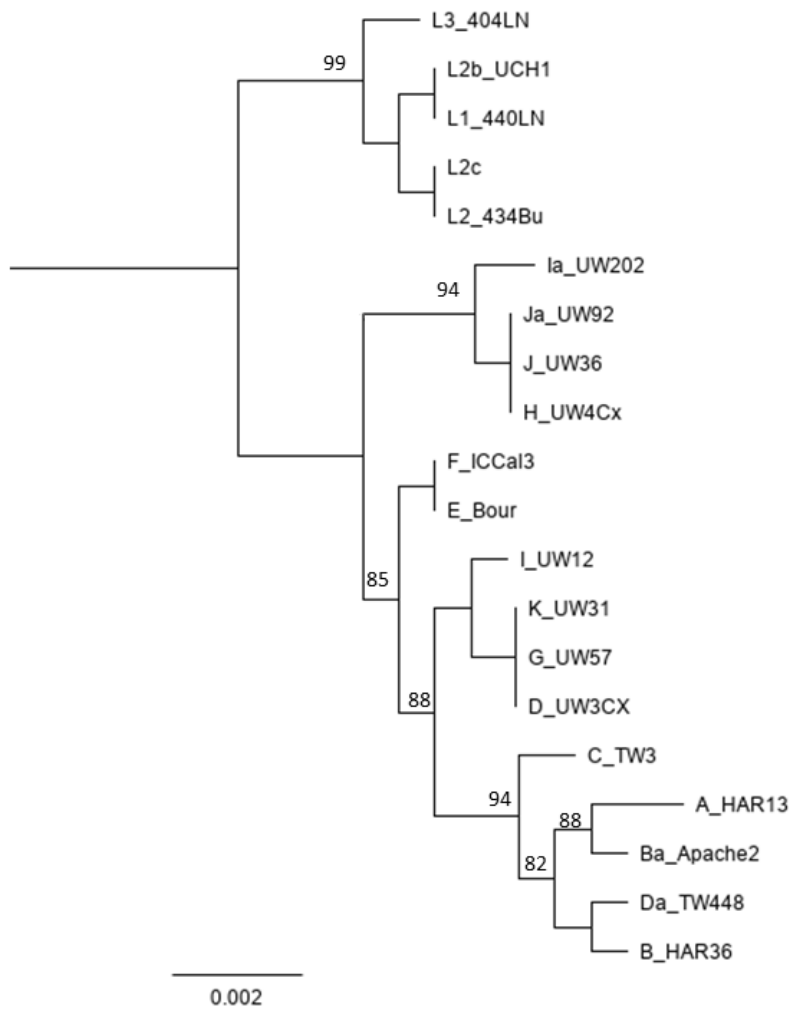

**Supplementary Fig 1.** Concatenated *trpRBA* phylogenetic tree of 21 *Ct* reference strains constructed by FastTree with a Generalized Time-Reversible model based on a MAFFT alignment of *trpRBA* sequences (see Methods). Both were executed in Geneious (<https://www.geneious.com>). The tree scale indicates the distance between the sequences and the branch length indicates the number of substitutions that have occurred in that branch.
