# Supplementary material for: Tryptophan Operon Diversity Reveals Evolutionary Trends among Geographically Disparate Chlamydia trachomatis Ocular and Urogenital Strains Affecting Tryptophan Repressor and Synthase Function
Source: PubMed Central journal article supplement (PMC8262981; doi:10.1128/mbio.00605-21), 2021-05-11
Supplement: mbio.00605-21-sf002.pdf [file mbio.00605-21-sf002.pdf]

### Chain A

mAQQSPYSAAMAEQRHQEWLRFVDLLKNAYQNDLHPLLN**LMLL**PDEREALG**TRVR**IVEELLRGEM**SQRELKNELGAGIATITRGSNYLKAAPVELRQWLEEVLL**ksdlehhhhh  
IAC2  
IAC1  
DBS1  
EDO

LMLL  
R IV  
T R G Y  
QRELKNELGAGIATITRGSNYLKA  
PVE R

### Chain B

mAQQSPYSAAMAEQRHQEWLRFVDLLKNAYQNDLHPLLN**LMLL**PDEREALG**TRVR**IVEELLRGEM**SQRELKNELGAGIATITRGSNYLKAAPVELRQWLEEVLL**ksdlehhhhh  
IAC1  
IAC2  
DBS2

LMLL  
R IV  
T R G Y  
QRELKNELGAGIATITRGSNYLKA

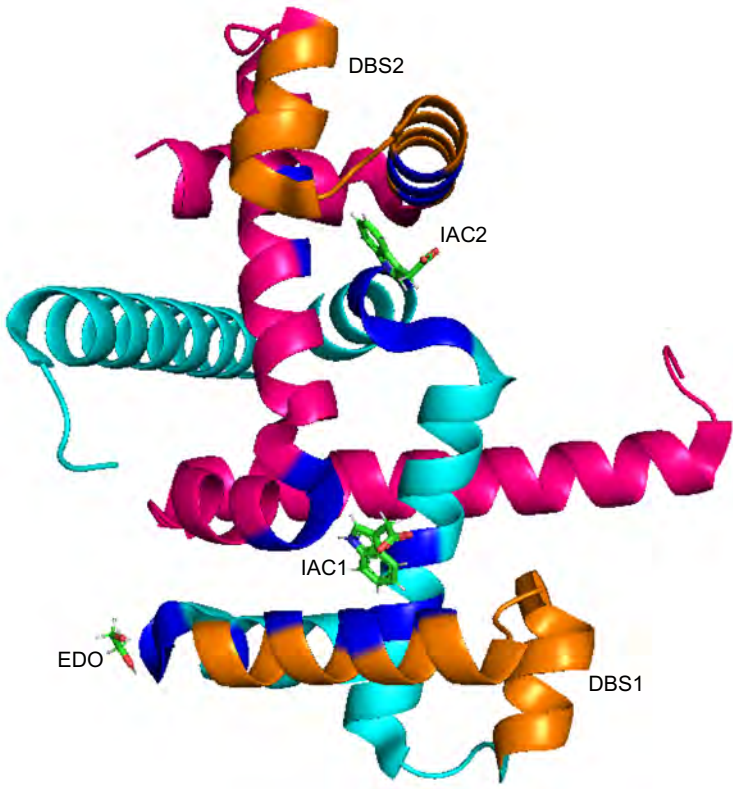

**Supplementary Fig 2.** Crystal structure of tryptophan repressor in *E.coli*, PDB: 6ENI. The two monomer subunits of the symmetric dimer are shown as cartoon diagrams, chain A in cyan and chain B in pink. Two molecules of indol-3-acetic acid (IAC) is bound at chain A and chain B, the 1,2-ethanediol (EDO) is bound at chain A only. The DNA binding motif (DBS) involved in the protein-DNA (operator binding) interactions is shown in orange and is present in chain A and B. The putative ligand binding sites for IAC and EDO are shown in blue. The reference sequence of *E.coli* TrpR 6eni with the LBS (blue), DBS (orange) and residues involved in dimerization (bold) are shown as well. Each molecule of the ligand IAC has LBS on chain A and chain B, respectively.
