# Supplementary material for: Tryptophan Operon Diversity Reveals Evolutionary Trends among Geographically Disparate Chlamydia trachomatis Ocular and Urogenital Strains Affecting Tryptophan Repressor and Synthase Function
Source: PubMed Central journal article supplement (PMC8262981; doi:10.1128/mbio.00605-21), 2021-05-11
Supplement: mbio.00605-21-sf003.pdf [file mbio.00605-21-sf003.pdf]

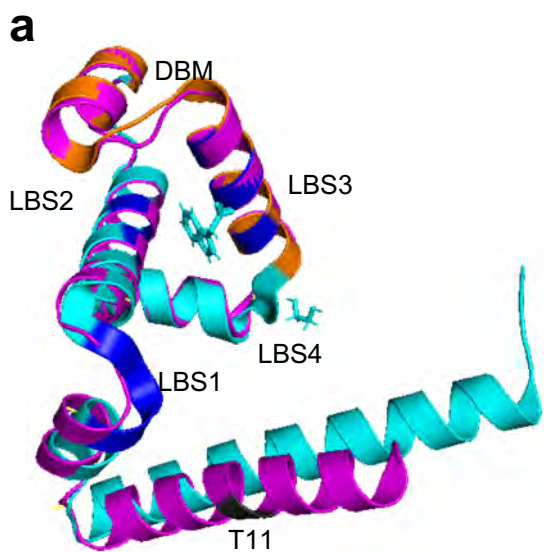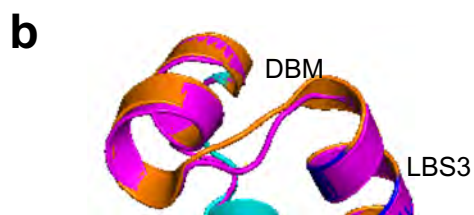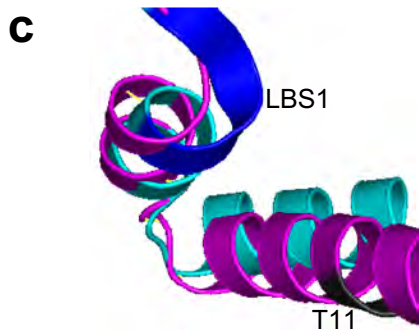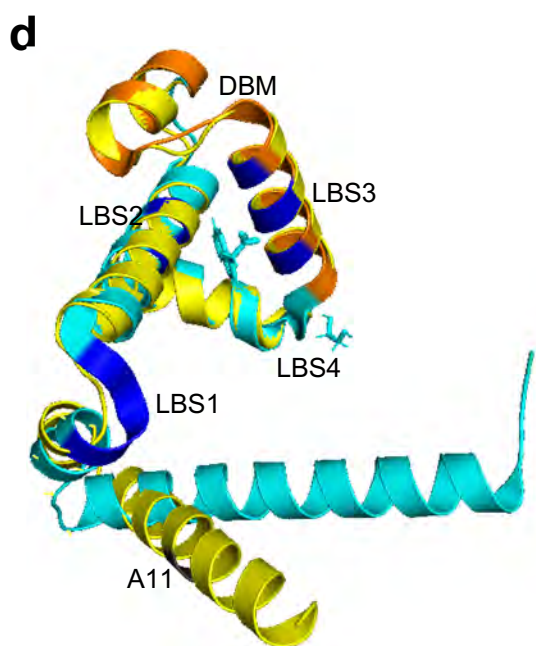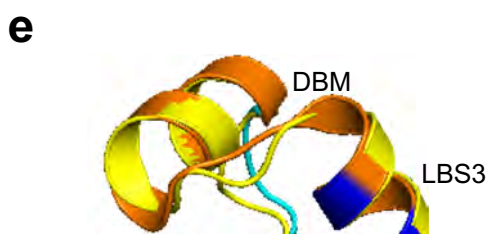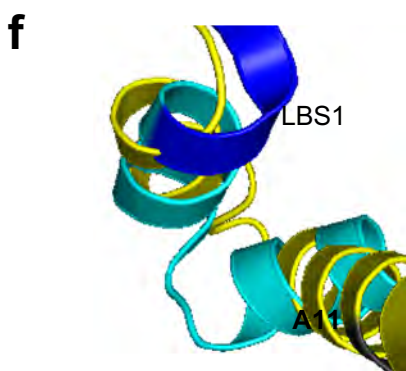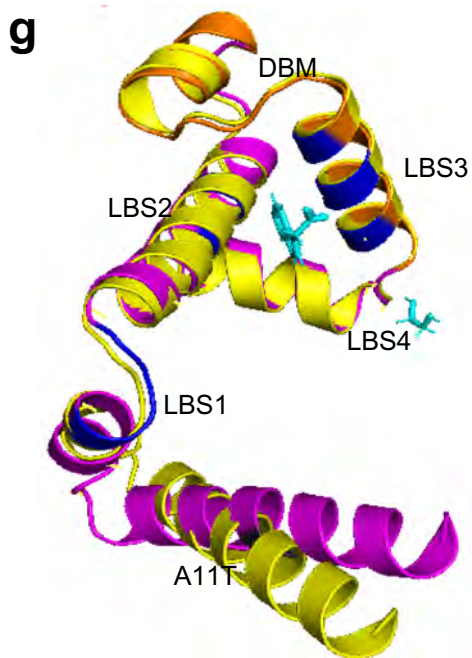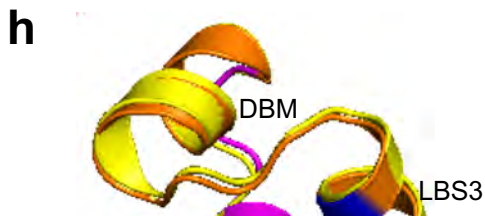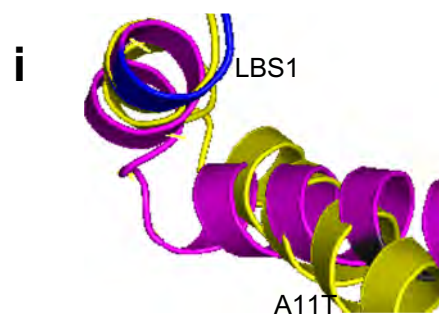

**Supplementary Fig 3.** TrpR 3D predicted structures of *Ct* clinical F\_SwabB8 and reference F\_IC-Cal-3 strains (A-I). (A) TrpR structure of *Ct* mutant strain F\_SwabB8 (magenta) superimposed on the template 6eniA (cyan), with DBM in orange. The LBS 1, 2, 3 and 4 are shown in dark blue, and the aa substitution in relation to F\_IC-Cal-3 at T11 is in black. (B and C) Structural changes in DBM and LBS1, respectively, of the mutant are shown. (D) TrpR structure of F\_IC-Cal-3 (yellow) superimposed on the template 6eniA (cyan) with annotations as per A, B and C. (E and F) Structural changes in DBM and LBS1 of E\_Bour. (G) TrpR 3D predicted structures of F\_SwabB8 superimposed on F\_IC-Cal-3 with structural changes noted in relation to (H) DBM based and (I) LBS1.
