# Supplementary material for: Tryptophan Operon Diversity Reveals Evolutionary Trends among Geographically Disparate Chlamydia trachomatis Ocular and Urogenital Strains Affecting Tryptophan Repressor and Synthase Function
Source: PubMed Central journal article supplement (PMC8262981; doi:10.1128/mbio.00605-21), 2021-05-11
Supplement: mbio.00605-21-sf004.pdf [file mbio.00605-21-sf004.pdf]

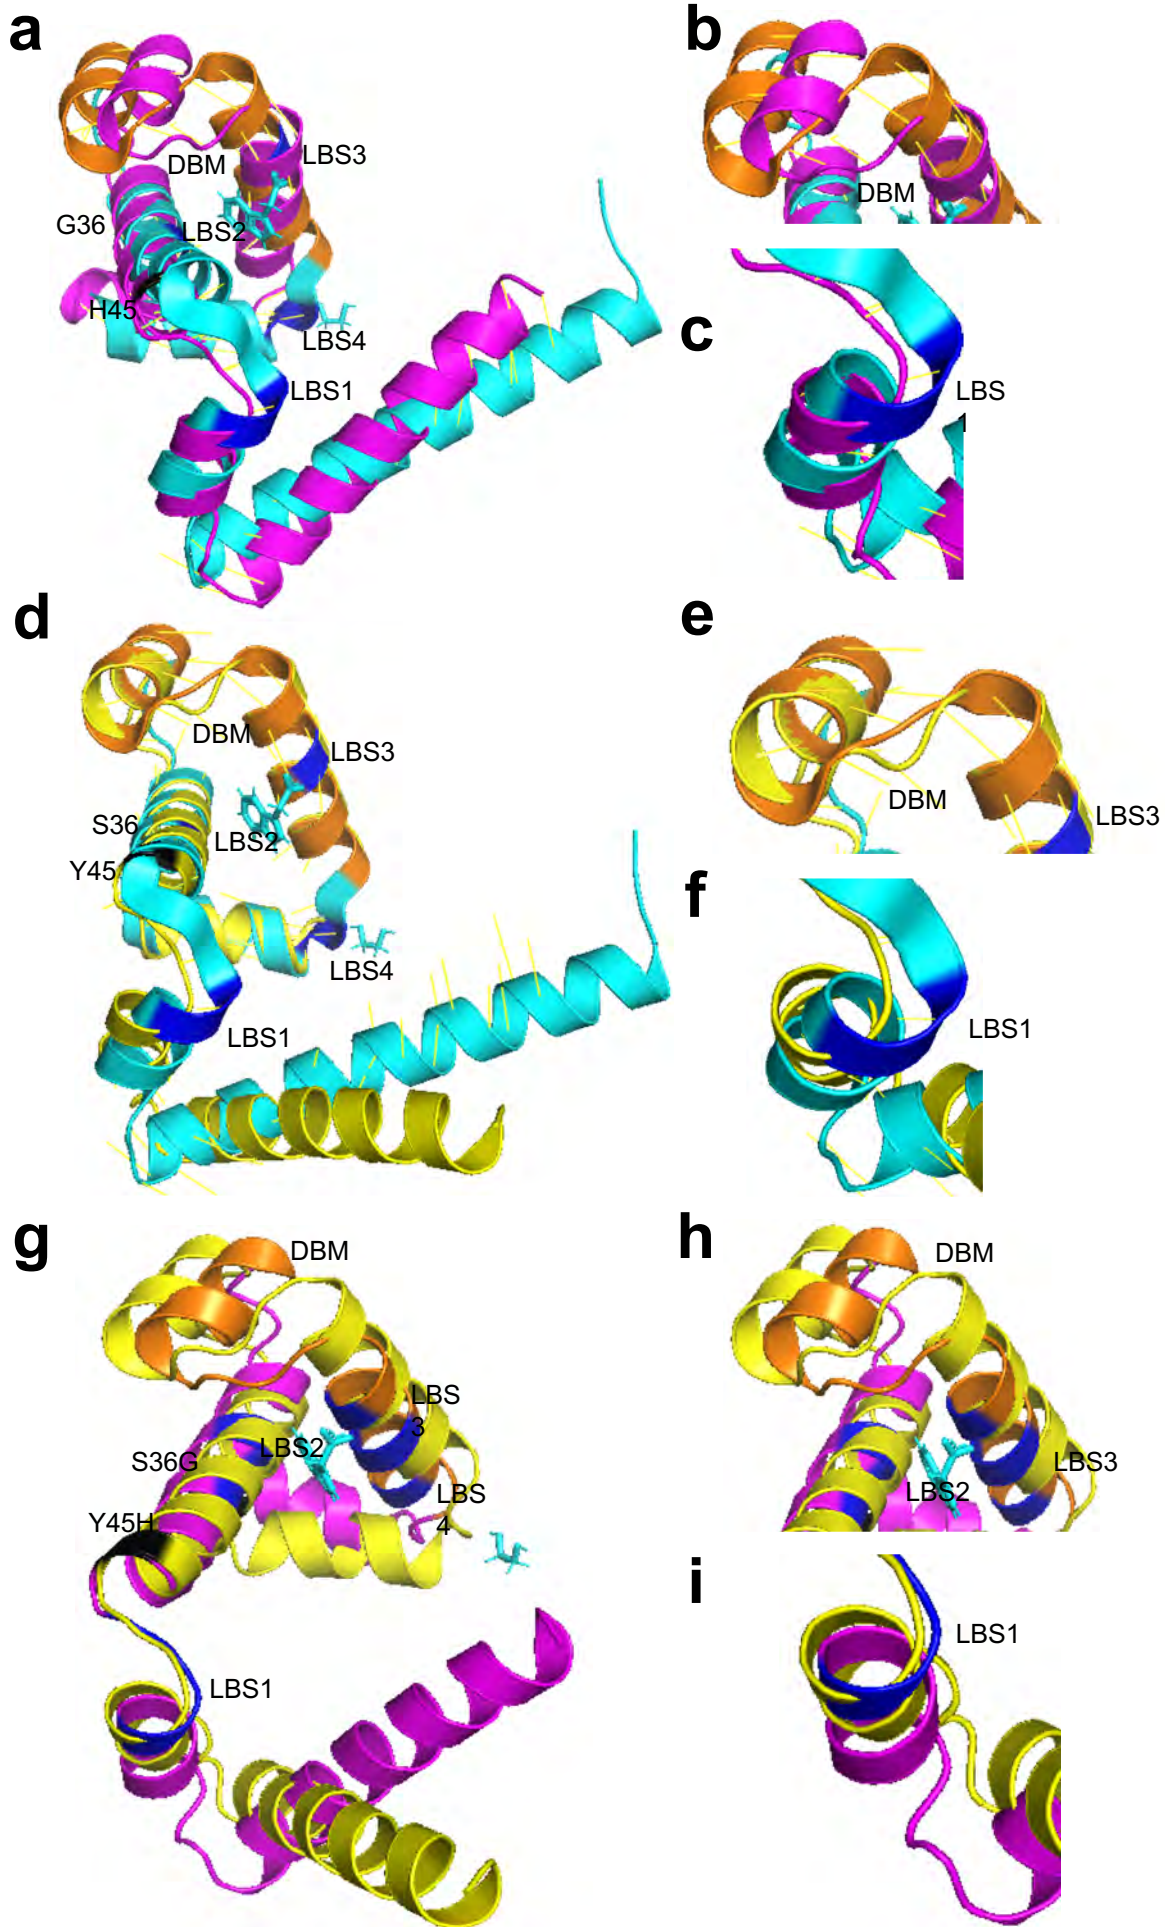

**Supplementary Fig 4.** TrpR 3D predicted structures of *Ct* clinical J\_SF5 and reference J\_UW-36 strains (A-I). (A) TrpR structure of *Ct* mutant strain J\_SF5 (magenta) superimposed on the template 6eniA (cyan), with DBM in orange. The LBS 1, 2, 3 and 4 are shown in dark blue, and the aa substitution in relation to J\_UW-36 at G36 and H45 is in black. (B and C) Structural changes in DBM and LBS1, respectively, of the mutant are shown. (D) TrpR structure of J\_UW-36 (yellow) superimposed on the template 6eniA (cyan) with annotations as per A, B and C. (E and F) Structural changes in DBM and LBS1 of J\_UW-36. (G) TrpR 3D predicted structures of J\_SF5 superimposed on J\_UW-36 with structural changes noted in relation to J\_UW-36 at LBS1 and DBM based on S36G and Y45H aa substitution (H and I).
