# Supplementary material for: Tryptophan Operon Diversity Reveals Evolutionary Trends among Geographically Disparate Chlamydia trachomatis Ocular and Urogenital Strains Affecting Tryptophan Repressor and Synthase Function
Source: PubMed Central journal article supplement (PMC8262981; doi:10.1128/mbio.00605-21), 2021-05-11
Supplement: mbio.00605-21-sf005.pdf [file mbio.00605-21-sf005.pdf]

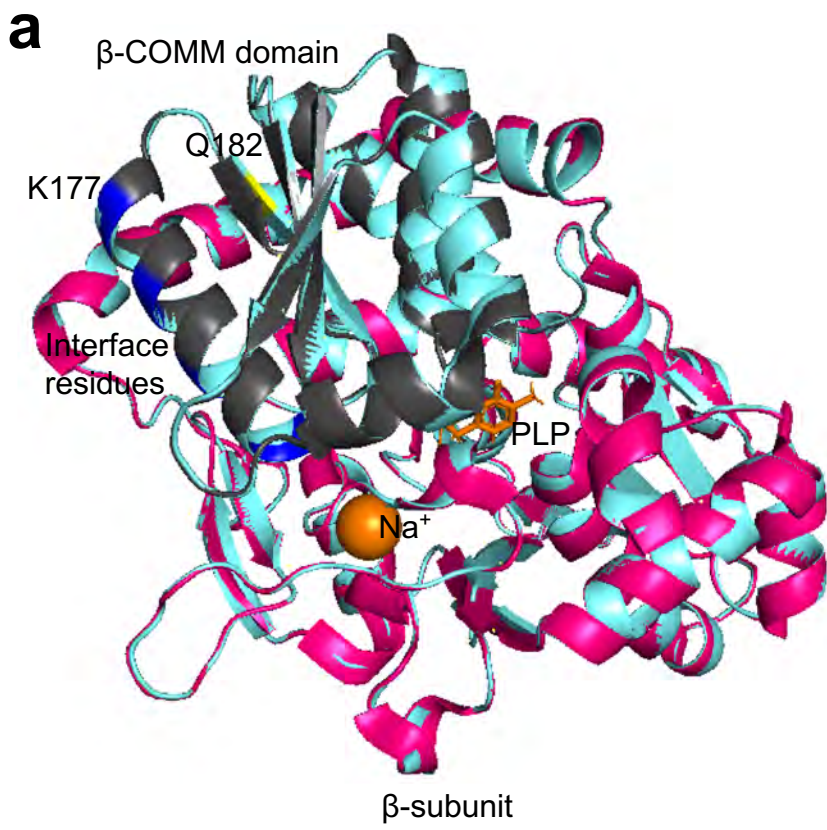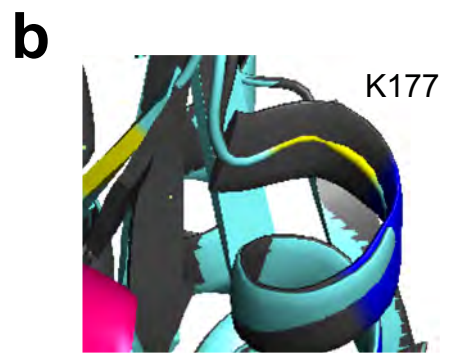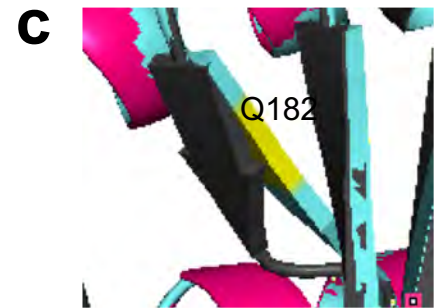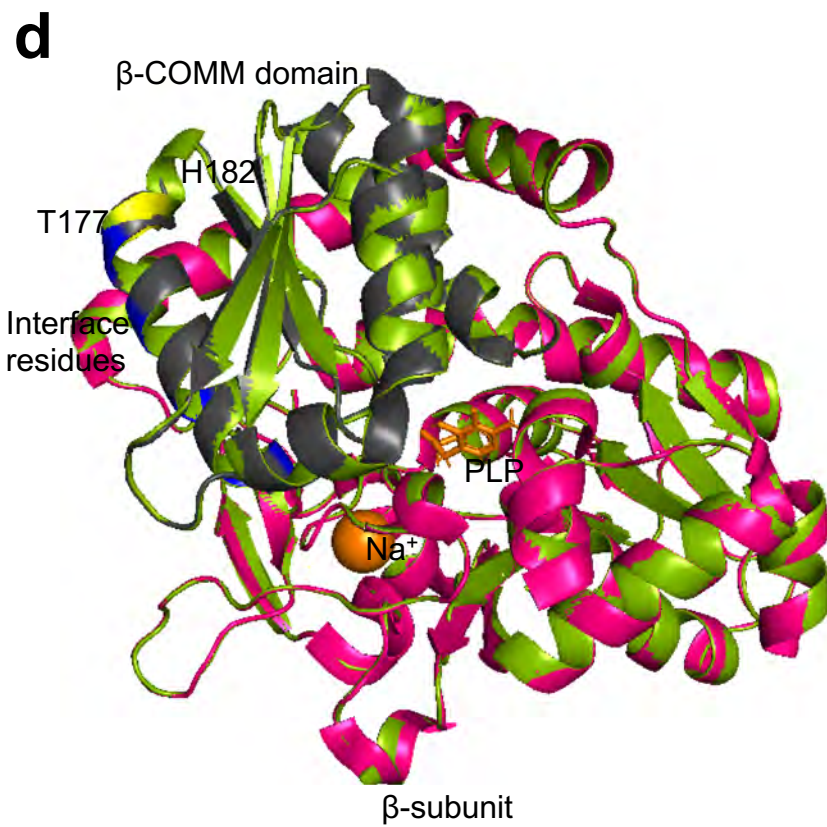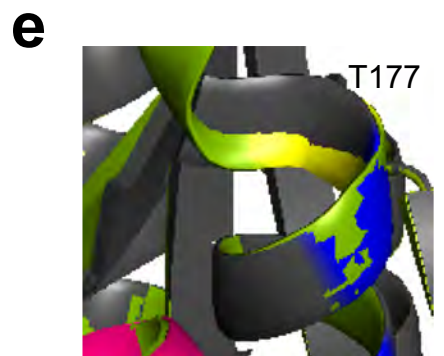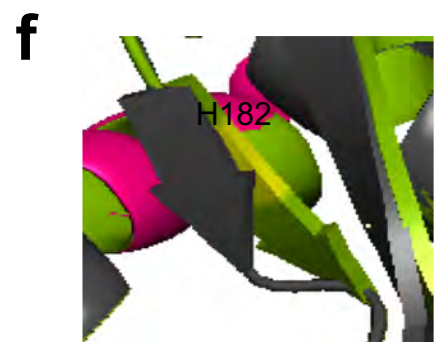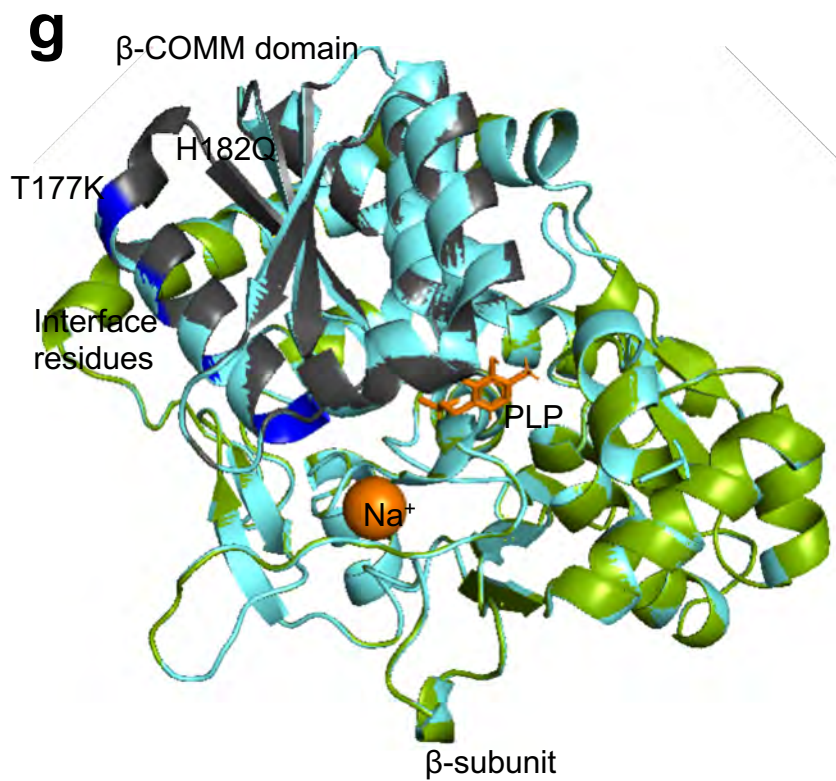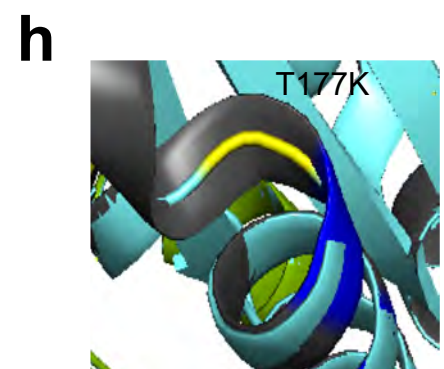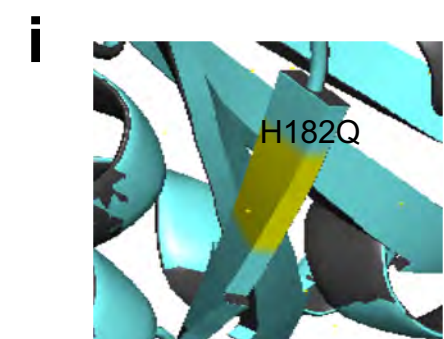

**Supplementary Fig 5.** TrpB 3D predicted structures of *Ct* clinical I\_UK913341 and reference I\_UW12 strains (A-I). (A) TrpB structure of mutant strain I\_UK913341 (cyan) superimposed on the template 5ey5 (magenta), with the COMM domain in charcoal grey. TrpB interface residues that interact with TrpA are shown in blue and the aa substitution in relation to E\_Bour at K177 and Q182 are in yellow. (B and C) Structural changes in  $\beta$  subunit interface and COMM domain residues of the mutant E\_SotonE8 are shown. (D) TrpB structure of I\_UW12 (green) superimposed on the template 5ey5 (magenta) with annotations as per A, B and C. (E and F) Structural changes in  $\beta$  subunit interface and COMM domain residues of the reference I\_UW12 are shown. (G) TrpB predicted structures of I\_UK913341 superimposed on I\_UW12 with structural changes noted in relation to (H)  $\beta$  subunit interface residues on P381L and (I) COMM domain on P304S.
