# Supplementary material for: Tryptophan Operon Diversity Reveals Evolutionary Trends among Geographically Disparate Chlamydia trachomatis Ocular and Urogenital Strains Affecting Tryptophan Repressor and Synthase Function
Source: PubMed Central journal article supplement (PMC8262981; doi:10.1128/mbio.00605-21), 2021-05-11
Supplement: mbio.00605-21-st001.pdf [file mbio.00605-21-st001.pdf]

**Table S1.** Primary recombination analysis in the tryptophan operon for global *C. trachomatis* strains (n=595) using RDP4.

|   | Daughter          | Major parent        | Minor parent       | Beginning | Ending | Uncorrected             | MC corrected           | Identified by (Av. P-Val)                                                                                                                      | Recombinant score                                            |
|---|-------------------|---------------------|--------------------|-----------|--------|-------------------------|------------------------|------------------------------------------------------------------------------------------------------------------------------------------------|--------------------------------------------------------------|
| 1 | <b>B_9</b>        | A_HAR13             | L3_404LN           | 1090      | 1450   | 6.163X10 <sup>-6</sup>  | 7.396X10 <sup>-3</sup> | GENECONV (1.123X10 <sup>-2</sup> )<br>Bootscan (1.124X10 <sup>-2</sup> )<br>Maxchi (2.381X10 <sup>-2</sup> )<br>3Seq (3.223X10 <sup>-2</sup> ) | 0.549 (B_9)<br>0.196 (A_HAR13)<br>0.255 (L3_404LN)           |
| 2 | <b>A_8</b>        | A_HAR13             | L3_404LN           | 971       | 1555   | 8.421X10 <sup>-6</sup>  | 1.011X10 <sup>-3</sup> | GENECONV (1.123X10 <sup>-2</sup> )<br>Bootscan (1.124X10 <sup>-2</sup> )<br>Maxchi (2.381X10 <sup>-2</sup> )<br>3Seq (3.223X10 <sup>-2</sup> ) | 0.549 (B_9)<br>0.196 (A_HAR13)<br>0.255 (L3_404LN)           |
|   |                   | A_HAR13             | B_9                | 971       | 1555   | 8.431X10 <sup>-6</sup>  | 1.011X10 <sup>-3</sup> | MaxChi (2.629X10 <sup>-2</sup> )<br>3Seq (1.360X10 <sup>-2</sup> )                                                                             | 0.549 (B_9)<br>0.196 (A_HAR13)<br>0.255 (L3_404LN)           |
|   | <b>A_15</b>       | A_HAR13<br>(99.8%)  | L3_404LN           | 1012      | 1438   | 5.575X10 <sup>-6</sup>  | 6.908X10 <sup>-6</sup> | GENECONV (1.123X10 <sup>-2</sup> )<br>Bootscan (1.124X10 <sup>-2</sup> )<br>Maxchi (2.381X10 <sup>-2</sup> )<br>3Seq (3.223X10 <sup>-2</sup> ) | 0.549 (B_9)<br>0.196 (A_HAR13)<br>0.255 (L3_404LN)           |
|   |                   | A_HAR13<br>(99.8%)  | B_9 (92.9%)        | 1090      | 1206   | 5.604X10 <sup>-6</sup>  | 6.725X10 <sup>-3</sup> | MaxChi (2.629X10 <sup>-2</sup> )<br>3Seq (1.360X10 <sup>-2</sup> )                                                                             | 0.446 (A_15)<br>0.215 (A_HAR13)<br>0.339 (B_9)               |
|   | <b>A_S45</b>      | A_HAR13             | B_9 (99.6%)        | 1339      | 1206   | 1.567X10 <sup>-4</sup>  | 1.881X10 <sup>-2</sup> | MaxChi (2.629X10 <sup>-2</sup> )<br>3Seq (1.360 X10 <sup>-2</sup> )                                                                            | 0.446 (A_S45)<br>0.215 (A_HAR13)<br>0.339 (B_9)              |
| 3 | <b>B_QH111L</b>   | D_Fin163 (99.3%)    | E_UK769748         | 332       | 1912   | 1.182X10 <sup>-4</sup>  | 1.418X10 <sup>-2</sup> | 3Seq (1.418X10 <sup>-2</sup> )                                                                                                                 | 0.452 (B_QH111L)<br>0.305 (D_Fin163)<br>0.242 (E_UK769748)   |
| 4 | <b>I_UK913341</b> | L3_404LN<br>(99.3%) | E_UK769748         | 433       | 2486   | 4.014X10 <sup>-4</sup>  | 4.817X10 <sup>-2</sup> | 3Seq (7.766X10 <sup>-2</sup> )                                                                                                                 | 0.537 (I_UK913341)<br>0.253 (L3_404LN)<br>0.210 (E_UK769748) |
|   | <b>Ia_SF16</b>    | L3_404LN<br>(98.9%) | E_UK769748 (99.8%) | 433       | 2486   | 7.87 X 10 <sup>-3</sup> | 0.944                  | 3Seq (7.766X10 <sup>-2</sup> )                                                                                                                 | 0.537 (Ia_SF16)<br>0.253 (L3404LN)<br>0.210 (EUK769748)      |

|                  |                     |                    |     |      |                        |       |                                |                                                             |
|------------------|---------------------|--------------------|-----|------|------------------------|-------|--------------------------------|-------------------------------------------------------------|
| <b>Ia_SF27</b>   | L3_404LN<br>(98.9%) | E_UK769748 (99.8%) | 433 | 2486 | $7.87 \times 10^{-3}$  | 0.944 | 3Seq (7.766X10 <sup>-3</sup> ) | 0.537 (Ia_SF27)<br>0.253 (L3_404LN)<br>0.210 (E_UK769748)   |
| <b>I_NL58</b>    | L3_404LN<br>(98.9%) | E_UK769748 (99.8%) | 433 | 2486 | $6.597 \times 10^{-3}$ | 0.791 | 3Seq (7.766X10 <sup>-3</sup> ) | 0.537 (I_NL58)<br>0.253 (L3_404LN)<br>0.210 (E_UK769748)    |
| <b>I_NL63</b>    | L3_404LN<br>(98.9%) | E_UK769748 (99.8%) | 433 | 2486 | $6.597 \times 10^{-3}$ | 0.791 | 3Seq (7.766X10 <sup>-3</sup> ) | 0.537 (I_NL63)<br>0.253 (L3_404LN)<br>0.210 (E_UK769748)    |
| <b>I_NL69</b>    | L3_404LN<br>(98.9%) | E_UK769748 (99.8%) | 433 | 2486 | $6.597 \times 10^{-3}$ | 0.791 | 3Seq (7.766X10 <sup>-3</sup> ) | 0.537 (I_NL69)<br>0.253 (L3_404LN)<br>0.210 (E_UK769748)    |
| <b>I_NL70</b>    | L3_404LN<br>(98.9%) | E_UK769748 (99.8%) | 433 | 2486 | $6.597 \times 10^{-3}$ | 0.791 | 3Seq (7.766X10 <sup>-3</sup> ) | 0.537 (I_NL70)<br>0.253 (L3_404LN)<br>0.210 (E_UK769748)    |
| <b>I_S2459</b>   | L3_404LN<br>(98.9%) | E_UK769748 (99.8%) | 433 | 2486 | $6.597 \times 10^{-3}$ | 0.791 | 3Seq (7.766X10 <sup>-3</sup> ) | 0.537 (I_S2459)<br>0.253 (L3_404LN)<br>0.210 (E_UK769748)   |
| <b>Ia_20-97</b>  | L3_404LN<br>(98.9%) | E_UK769748 (99.8%) | 433 | 2486 | $6.597 \times 10^{-3}$ | 0.791 | 3Seq (7.766X10 <sup>-3</sup> ) | 0.537 (Ia_20-97)<br>0.253 (L3_404LN)<br>0.210 (E_UK769748)  |
| <b>Ia_Soton1</b> | L3_404LN<br>(98.9%) | E_UK769748 (99.8%) | 433 | 2486 | $6.597 \times 10^{-3}$ | 0.791 | 3Seq (7.766X10 <sup>-3</sup> ) | 0.537 (Ia_Soton1)<br>0.253 (L3_404LN)<br>0.210 (E_UK769748) |
| <b>Ia_Soton3</b> | L3_404LN<br>(98.9%) | E_UK769748 (99.8%) | 433 | 2486 | $6.597 \times 10^{-3}$ | 0.791 | 3Seq (7.766X10 <sup>-3</sup> ) | 0.537 (Ia_Soton2)<br>0.253 (L3_404LN)<br>0.210 (E_UK769748) |
| <b>Ia_UW202</b>  | L3_404LN<br>(98.9%) | E_UK769748 (99.8%) | 433 | 2486 | $8.33 \times 10^{-3}$  | 1     | 3Seq (7.766X10 <sup>-3</sup> ) | 0.537 (Ia_UW202)<br>0.253 (L3_404LN)<br>0.210 (E_UK769748)  |
