# Supplementary material for: Tryptophan Operon Diversity Reveals Evolutionary Trends among Geographically Disparate Chlamydia trachomatis Ocular and Urogenital Strains Affecting Tryptophan Repressor and Synthase Function
Source: PubMed Central journal article supplement (PMC8262981; doi:10.1128/mbio.00605-21), 2021-05-11
Supplement: mbio.00605-21-st002.pdf [file mbio.00605-21-st002.pdf]

**Table S2.** Secondary analysis of putative *C. trachomatis* recombinants involving the tryptophan operon identified by RDP4 using Recco.

| Sequence name | Start* | End* | Savings <sup>^</sup> | Aln pv <sup>#</sup> | Seq pv <sup>~</sup> | overall p-value | Mutation Cost |
|---------------|--------|------|----------------------|---------------------|---------------------|-----------------|---------------|
| B_QH111L      | 1935   | 2291 | 2                    | 1                   | 0.23077             | 1               | 12            |
| B_QH111L      | 107    | 245  | 1                    | 1                   | 0.93507             |                 | 11            |
| I_UK913341    | 246    | 314  | 2                    | 1                   | 0.2997              | 1               | 10            |
| I_UK913341    | 332    | 531  | 2                    | 1                   | 0.2997              |                 | 10            |
| I_UK913341    | 2472   | 2473 | 0.4                  | 1                   | 1                   |                 | 9.2           |

\*Range of nucleotide positions where a recombination breakpoint could occur.

<sup>^</sup>Amount of mutation cost saved by introducing this recombination.

<sup>#</sup>p-value of this recombination event regarding savings distribution over the entire alignment - a very conservative measure for recombination.

<sup>~</sup>p-value of this recombination event regarding savings distribution over recombinant.
