# Supplementary material for: Tryptophan Operon Diversity Reveals Evolutionary Trends among Geographically Disparate Chlamydia trachomatis Ocular and Urogenital Strains Affecting Tryptophan Repressor and Synthase Function
Source: PubMed Central journal article supplement (PMC8262981; doi:10.1128/mbio.00605-21), 2021-05-11
Supplement: mbio.00605-21-st003.pdf [file mbio.00605-21-st003.pdf]

**Table S3.** Nucleotide polymorphisms in *trpB* for *C. trachomatis* clinical and reference ocular strains.

| Lineage    | Site of infection | Unique <i>trpB</i> strain variants | Year of isolation | Geography      | Number of variants | Variant ID                                                                                                                                                                                                                                                                                                                                                                                                                                                                                                   | Year of isolation | Geography      | Changes to <i>trpB</i>                                      | Length of <i>trpB</i> (bp) |
|------------|-------------------|------------------------------------|-------------------|----------------|--------------------|--------------------------------------------------------------------------------------------------------------------------------------------------------------------------------------------------------------------------------------------------------------------------------------------------------------------------------------------------------------------------------------------------------------------------------------------------------------------------------------------------------------|-------------------|----------------|-------------------------------------------------------------|----------------------------|
| Ocular     | Ocular            | <b>A_HAR13</b>                     | 1958              | Egypt          | 7                  | A_D213, A_D230, A_SAI,                                                                                                                                                                                                                                                                                                                                                                                                                                                                                       | 1957, 2001        | Gambia, Saudi  | None                                                        | 1179                       |
|            |                   |                                    |                   |                |                    | A_363, A_5291, A_7249, A_MH858, A_MH1364, A_MH2145, A_MH3234, A_MH2497, A_MH4510, A_MH5368, A_MH5786, A_MH6446, A_MH7205, A_MH8910, A_MH9922, A_MH10549, A_MH10648, A_MH10901, A_MH11715, A_MH11979, A_MH12023, A_MH13849, A_MH14553, A_MH15048, A_MH15741, A_MH16005, A_MH16170, A_MH16665, A_MH17127, A_MH18843, A_MH18876, A_MH19676, A_MH20130, A_MH20933, A_MH21571, A_MH23527, A_MH24519, A_MH24640, A_MH24673, A_MH25256, A_MH25883, A_MH27137, A_MH35739, A_MH47300, A_MH53658, A_MH19657, A_MH26862 |                   |                |                                                             |                            |
| Ocular     | Ocular            | A_2497                             | 2000              | Tanzania       | 47                 |                                                                                                                                                                                                                                                                                                                                                                                                                                                                                                              | 2000              | Tanzania       | 931G>A;<br>Nonsynonymous substitution                       | 1179                       |
| Ocular     | Ocular            | A_SB002739                         | 2013              | Solomon Island | 4                  | A_SB006930, A_SB008107, A_SB13112, A_SB13321                                                                                                                                                                                                                                                                                                                                                                                                                                                                 | 2013              | Solomon Island | 1141C>T;<br>Nonsynonymous substitution                      | 1179                       |
| Ocular     | Ocular            | <b>B_HAR36*</b>                    | 1969              | Saudi Arabia   | 1                  | B_Jali16                                                                                                                                                                                                                                                                                                                                                                                                                                                                                                     | 1985              | Gambia         | None                                                        | 1179                       |
| Ocular     | Ocular            | B_TZ1A828                          | 1998              | Tanzania       | None               | None                                                                                                                                                                                                                                                                                                                                                                                                                                                                                                         | None              | None           | 8-28del; frameshift and early truncation                    | 33                         |
| Urogenital | Ocular            | B_QH111L                           | 2016              | China          | None               | None                                                                                                                                                                                                                                                                                                                                                                                                                                                                                                         | None              | None           | 58C>T, 137A>G;<br>Synonymous and nonsynonymous substitution | 603                        |
| Ocular     | Ocular            | B_M48                              | 2007              | Gambia         | None               | None                                                                                                                                                                                                                                                                                                                                                                                                                                                                                                         | None              | None           | 557-558insGA; early truncation                              | 570                        |
| Ocular     | Ocular            | B_Jali20                           | 1985              | Gambia         | None               | None                                                                                                                                                                                                                                                                                                                                                                                                                                                                                                         | None              | None           | 986G>C                                                      | 1179                       |
| Ocular     | Ocular            | <b>Ba_Apache2</b>                  | 1960              | USA            | None               | None                                                                                                                                                                                                                                                                                                                                                                                                                                                                                                         | None              | None           | 1141C>T;<br>Nonsynonymous substitution                      | 1179                       |
| Ocular     | Ocular            | <b>C_TW3</b>                       | 1959              | Taiwan         | None               | None                                                                                                                                                                                                                                                                                                                                                                                                                                                                                                         | None              | None           | None                                                        | 1179                       |
| Ocular     | Ocular            | C_UW10                             | 1964              | Canada         | None               | None                                                                                                                                                                                                                                                                                                                                                                                                                                                                                                         | None              | None           | 179G>A;<br>synonymous substitution                          | 1179                       |
| Ocular     | Ocular            | <b>Da_TW448</b>                    | 1985              | Taiwan         | None               | None                                                                                                                                                                                                                                                                                                                                                                                                                                                                                                         | None              | None           | None                                                        | 1179                       |

Note: *trpB* truncations are seen in B\_TZ1A828, B\_QH111L, B\_M48.

\*Since *Ct* reference strain B\_UW50T lacks *trpB* gene, B\_HAR-36 was used as the reference strain for B genotype strains.
