# Supplementary material for: Tryptophan Operon Diversity Reveals Evolutionary Trends among Geographically Disparate Chlamydia trachomatis Ocular and Urogenital Strains Affecting Tryptophan Repressor and Synthase Function
Source: PubMed Central journal article supplement (PMC8262981; doi:10.1128/mbio.00605-21), 2021-05-11
Supplement: mbio.00605-21-st004.pdf [file mbio.00605-21-st004.pdf]

**Table S4.** Nucleotide polymorphisms in *trpA* for *C. trachomatis* clinical and reference ocular strains.

| Lineage    | Site of infection | Unique <i>trpA</i> strain variants | Year of isolation | Geography    | No. of variants | Variant ID                                                                                                                                                                                                                                                                                                                                                                                                                                                                                                    | Year of isolation | Geography       | Changes to <i>trpA</i>                                   | Length of <i>trpA</i> (bp) |
|------------|-------------------|------------------------------------|-------------------|--------------|-----------------|---------------------------------------------------------------------------------------------------------------------------------------------------------------------------------------------------------------------------------------------------------------------------------------------------------------------------------------------------------------------------------------------------------------------------------------------------------------------------------------------------------------|-------------------|-----------------|----------------------------------------------------------|----------------------------|
| Ocular     | Ocular            | <b>A HAR13</b>                     | 1958              | Egypt        | 9               | A_SB002739, A_SB006930, A_SB008107, A_SB13112, A_SB13321                                                                                                                                                                                                                                                                                                                                                                                                                                                      | 2013              | Soloman Islands | 529delC; frameshift                                      | 552                        |
| Ocular     | Ocular            | A_2497                             | 2000              | Tanzania     | 47              | A_363, A_5291, A_7249, A_MH858, A_MH1364, A_MH2145, A_MH3234, A_MH2497, A_MH4510, A_MH5368, A_MH5786, A_MH6446, A_MH7205, A_MH8910, A_MH9922, A_MH10549, A_MH10648, A_MH10901, A_MH11715, A_MH11979, A_MH12023, A_MH13849, A_MH14553, A_MH15048, A_MH15741, A_MH16005, A_MH16170, A_MH16665, A_MH17127, A_MH18843, A_MH18876, A_MH19679, A_MH20933, A_MH20130, A_MH21571, A_MH23527, A_MH24519, A_MH24640, A_MH24673, A_MH25256, A_MH25883, A_MH27137, A_MH35739, A_MH_47300, A_MH53658, A_MH26862, A_MH19657 | 2000, 2001        | Tanzania        | 117-118insGT; frameshift                                 | 138                        |
| Ocular     | Ocular            | A_D213                             | 2001              | Gambia       | 1               | A_230                                                                                                                                                                                                                                                                                                                                                                                                                                                                                                         | 2001              | Gambia          | 116A>G; nonsynonymous substitution                       | 552                        |
| Ocular     | Ocular            | <b>Ba Apache2</b>                  | 1960              | USA          | None            | None                                                                                                                                                                                                                                                                                                                                                                                                                                                                                                          | None              | None            | 529delC; frameshift                                      | 552                        |
| Ocular     | Ocular            | <b>B HAR36*</b>                    | 1969              | Saudi Arabia | None            | None                                                                                                                                                                                                                                                                                                                                                                                                                                                                                                          | None              | None            | 205G>T; early truncation                                 | 207                        |
| Ocular     | Ocular            | B_Jali16                           | 1985              | Gambia       | None            | None                                                                                                                                                                                                                                                                                                                                                                                                                                                                                                          | None              | None            | 121G>A; nonsynonymous substitution; 529delC; frameshift  | 552                        |
| Ocular     | Ocular            | B_Jali20                           | 1985              | Gambia       | None            | None                                                                                                                                                                                                                                                                                                                                                                                                                                                                                                          | None              | None            | 529delC; frameshift                                      | 552                        |
| Ocular     | Ocular            | B_M48                              | 2007              | Gambia       | None            | None                                                                                                                                                                                                                                                                                                                                                                                                                                                                                                          | None              | None            | 157G>A; synonymous substitution; 529delC; frameshift     | 552                        |
| Urogenital | Ocular            | B_QH111L                           | 2016              | China        | None            | None                                                                                                                                                                                                                                                                                                                                                                                                                                                                                                          | None              | None            | 410-412insATT; 492-604del; frameshift & early truncation | 498                        |
| Ocular     | Ocular            | B_TZ1A828                          | 1998              | Tanzania     | None            | None                                                                                                                                                                                                                                                                                                                                                                                                                                                                                                          | None              | None            | None                                                     | 759                        |
| Ocular     | Ocular            | <b>C TW-3</b>                      | 1959              | Taiwan       | None            | None                                                                                                                                                                                                                                                                                                                                                                                                                                                                                                          | None              | None            | 529delC; frameshift                                      | 552                        |
| Ocular     | Ocular            | C_UW10                             | 1964              | Canada       | None            | None                                                                                                                                                                                                                                                                                                                                                                                                                                                                                                          | None              | None            | 10C>A, 529delC; frameshift                               | 552                        |
| Ocular     | Ocular            | <b>Da TW448</b>                    | 1985              | Taiwan       | None            | None                                                                                                                                                                                                                                                                                                                                                                                                                                                                                                          | None              | None            | 529delC; frameshift                                      | 552                        |

Note: All ocular strains except for B\_QH111L have the 410-412 deletion. Reference strains are highlighted in bold.

\*Since *Ct* reference strain B\_UW50T lacks *trpA* gene, B\_HAR-36 is used as the reference strain for B genotype strains.
